# Supplementary material for: Influence of work ability and smoking on the prognosis of long-duration activity-limiting neck/back pain: a cohort study of a Swedish working population
Source: PubMed Central journal article supplement — BMJ Open. 2022 Apr 11;12(4):e054512. doi: 10.1136/bmjopen-2021-054512 (PMC9006807; doi:10.1136/bmjopen-2021-054512), 2022-04-11
Supplement: bmjopen-2021-054512.draft_revisions.pdf [file bmjopen-2021-054512.draft_revisions.pdf]

# BMJ Open

BMJ Open is committed to open peer review. As part of this commitment we make the peer review history of every article we publish publicly available.

When an article is published we post the peer reviewers' comments and the authors' responses online. We also post the versions of the paper that were used during peer review. These are the versions that the peer review comments apply to.

The versions of the paper that follow are the versions that were submitted during the peer review process. They are not the versions of record or the final published versions. They should not be cited or distributed as the published version of this manuscript.

BMJ Open is an open access journal and the full, final, typeset and author-corrected version of record of the manuscript is available on our site with no access controls, subscription charges or pay-per-view fees (<http://bmjopen.bmj.com>).

If you have any questions on BMJ Open's open peer review process please email [info.bmjopen@bmj.com](mailto:info.bmjopen@bmj.com)

# BMJ Open

## The influence of work ability and smoking on the prognosis of long-duration activity-limiting neck/back pain – a cohort study of a Swedish working population

|                               |                                                                                                                                                                                                                                                                                                                                                                                                                                                                                                                                                                                                                    |
|-------------------------------|--------------------------------------------------------------------------------------------------------------------------------------------------------------------------------------------------------------------------------------------------------------------------------------------------------------------------------------------------------------------------------------------------------------------------------------------------------------------------------------------------------------------------------------------------------------------------------------------------------------------|
| Journal:                      | <i>BMJ Open</i>                                                                                                                                                                                                                                                                                                                                                                                                                                                                                                                                                                                                    |
| Manuscript ID                 | bmjopen-2021-054512                                                                                                                                                                                                                                                                                                                                                                                                                                                                                                                                                                                                |
| Article Type:                 | Original research                                                                                                                                                                                                                                                                                                                                                                                                                                                                                                                                                                                                  |
| Date Submitted by the Author: | 14-Jun-2021                                                                                                                                                                                                                                                                                                                                                                                                                                                                                                                                                                                                        |
| Complete List of Authors:     | <p>Bohman, Tony; Karolinska Institutet, Institute of Environmental Medicine; Dalarna University School of Education Health and Social Studies</p> <p>Holm, Lena; Karolinska Institutet, Institute of Environmental Medicine</p> <p>Lekander, Mats; Stockholm University, Stress Research Institute; Karolinska Institutet, Department of Clinical Neuroscience</p> <p>Hallqvist, Johan; Uppsala University, Department of Public Health and Caring Sciences</p> <p>Skillgate, Eva; Karolinska Institutet, Institute of Environmental Medicine; Sophiahemmet University, Department of health promotion science</p> |
| Keywords:                     | Musculoskeletal disorders < ORTHOPAEDIC & TRAUMA SURGERY, PUBLIC HEALTH, EPIDEMIOLOGY, Back pain < ORTHOPAEDIC & TRAUMA SURGERY                                                                                                                                                                                                                                                                                                                                                                                                                                                                                    |
|                               |                                                                                                                                                                                                                                                                                                                                                                                                                                                                                                                                                                                                                    |

SCHOLARONE™  
Manuscripts

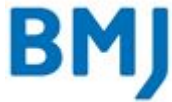

I, the Submitting Author has the right to grant and does grant on behalf of all authors of the Work (as defined in the below author licence), an exclusive licence and/or a non-exclusive licence for contributions from authors who are: i) UK Crown employees; ii) where BMJ has agreed a CC-BY licence shall apply, and/or iii) in accordance with the terms applicable for US Federal Government officers or employees acting as part of their official duties; on a worldwide, perpetual, irrevocable, royalty-free basis to BMJ Publishing Group Ltd ("BMJ") its licensees and where the relevant Journal is co-owned by BMJ to the co-owners of the Journal, to publish the Work in this journal and any other BMJ products and to exploit all rights, as set out in our [licence](#).

The Submitting Author accepts and understands that any supply made under these terms is made by BMJ to the Submitting Author unless you are acting as an employee on behalf of your employer or a postgraduate student of an affiliated institution which is paying any applicable article publishing charge ("APC") for Open Access articles. Where the Submitting Author wishes to make the Work available on an Open Access basis (and intends to pay the relevant APC), the terms of reuse of such Open Access shall be governed by a Creative Commons licence – details of these licences and which [Creative Commons](#) licence will apply to this Work are set out in our licence referred to above.

Other than as permitted in any relevant BMJ Author's Self Archiving Policies, I confirm this Work has not been accepted for publication elsewhere, is not being considered for publication elsewhere and does not duplicate material already published. I confirm all authors consent to publication of this Work and authorise the granting of this licence.

1  
2  
3  
4 The influence of work ability and smoking on the prognosis of long-  
5  
6  
7 duration activity-limiting neck/back pain – a cohort study of a  
8  
9  
10 Swedish working population  
11  
12

13 Tony Bohman<sup>1,2\*</sup>, Lena W Holm<sup>1</sup>, Mats Lekander<sup>3,4</sup>, Johan Hallqvist<sup>5</sup>, Eva Skillgate<sup>1,6</sup>  
14  
15  
16

17  
18 <sup>1</sup>Institute of Environmental Medicine, Unit of Intervention and Implementation Research for  
19  
20 Worker Health, Karolinska Institutet, Stockholm, Sweden  
21

22  
23 <sup>2</sup>School of Education, Health and Social Studies, Dalarna University, Sweden  
24

25  
26 <sup>3</sup>Stress Research Institute, Stockholm University, Sweden  
27

28  
29 <sup>4</sup>Department of Clinical Neuroscience, Karolinska Institutet, Stockholm, Sweden  
30

31  
32 <sup>5</sup>Department of Public Health and Caring Sciences, Family Medicine and Preventive  
33  
34 Medicine, Uppsala University, Uppsala, Sweden  
35

36  
37 <sup>6</sup>Department of health promotion science, Musculoskeletal & Sports Injury Epidemiology  
38  
39 Center, Sophiahemmet University, Stockholm, Sweden  
40

41  
42 \*Corresponding author:

43  
44 Tony Bohman

45  
46 Institute of Environmental Medicine, Unit of Intervention and Implementation Research for  
47  
48 Worker Health, Karolinska Institutet, Box 210, SE-171 77 Stockholm, Sweden  
49

50  
51 E-mail: [tony.bohman@ki.se](mailto:tony.bohman@ki.se)

52  
53 Cell phone: +46 70 299 62 63  
54  
55  
56  
57  
58  
59  
60

## Abstract

### Objectives

Long-duration activity-limiting neck/back pain is common, but the knowledge of what work and lifestyle factors that influence the prognosis is sparse. The objective was therefore to here evaluate if two factors, good self-perceived work ability and no daily smoking, are associated with a favourable prognosis of long-duration activity-limiting neck/back pain in a working population, and if these exposures have a synergistic prognostic effect.

### Design

A prospective cohort study based on three subsamples from the Stockholm Public Health Cohort.

### Settings

A working population in Stockholm County.

### Participants

Individuals, 18-61 years old, reporting long-duration activity-limiting neck/back pain the previous six months at baseline in 2010 (n=5,177).

### Measures

The exposures were: self-perceived work ability (categorised into good, moderate, and poor), and daily smoking (no/yes). The outcome in 2014 was “absence of long-duration activity-limiting neck/back pain” the previous six months representing a favourable prognosis of reported problems at baseline in 2010. Risk ratios (RRs) and risk differences (RDs) with 95% CI was estimated by general linear regressions, and the synergistic effect by the synergy index (SI) with 95% CI.

## Results

Participants with moderate or good work ability, respectively, had an adjusted RR for a favourable prognosis of 1.37 (95% CI: 1.11-1.69), and 1.80 (1.49-2.17) in comparison to participants with poor work ability. The corresponding adjusted RD were 0.07 (0.02-0.11) and 0.17 (0.12-0.22). Participants not smoking on daily basis had an adjusted RR of 1.21 (1.02-1.42), and an adjusted RD of 0.05 (0.01-0.10) for a favourable outcome compared to daily smokers. The adjusted SI was 0.92 (0.60-1.43).

## Conclusion

For participants with long-duration activity-limiting neck/back pain, moderate or good self-perceived work ability and not being a daily smoker were associated with a favourable prognosis but having both exposures seemed to have no synergistic prognostic effect.

Keywords: disability evaluation, musculoskeletal pain, public health, tobacco use

## Strengths and limitations of this study

- The longitudinal design ensures temporality and the comprehensive confounder control increase the possibility of a causal association between the exposures and the outcome.
- The large sample size and robust analyses strengthens the internal validity.
- The main limitations of this study are possible misclassification of the exposures and the outcome, a relatively large loss to follow-up and a possible change of exposure category during the follow-up period of four years, although these limitations most probably lead to an underestimation of the associations studied.

1  
2  
3  
4  
5  
6  
7  
8  
9  
10  
11  
12  
13  
14  
15  
16  
17  
18  
19  
20  
21  
22  
23  
24  
25  
26  
27  
28  
29  
30  
31  
32  
33  
34  
35  
36  
37  
38  
39  
40  
41  
42  
43  
44  
45  
46  
47  
48  
49  
50  
51  
52  
53  
54  
55  
56  
57  
58  
59  
60

- There is a possible risk that reversed causation have influenced the analyses with perceived work ability as exposure, but the additional analyses indicates that this risk is small.

For peer review only

## Introduction

According to the Global Burden of Disease study, neck pain and back pain are among the top causes for “years lived with disability”, with a high and rising prevalence globally (1). Most neck and back problems resolve, but many individuals experience pain for a long time following onset (2, 3). Between 17% to 70% of individuals with neck pain report activity-limiting pain (3). Long-duration activity-limiting neck/back pain (LANBP) is most prevalent in working age, and often decrease work performance (2, 4). From a public health perspective, LANBP adds to the societal and individual burden as it is a common cause for absenteeism and early retirement (5). Still, and in accordance with current recommendations, many individuals with musculoskeletal pain go to work (4).

One way to address this burden of LANBP is to increase the understanding of modifiable lifestyle and work-related factors associated to a favourable prognosis and their potential interactions. Research about prognosis of LANBP have so far focused on factors of potential importance for the transition from acute/sub-acute neck and back pain to LANBP, and several biopsychosocial factors are suggested to be associated to such an unfavourable prognosis. Examples of such factors are smoking, low physical activity, depression, anxiety and low work satisfaction (2, 6). On the other hand, only greater optimism, good social support, positive coping and exercise/sport activities are proposed as factors associated to a favourable prognosis for long-duration and activity-limiting neck pain, and none for back pain (6). Thus, knowledge of if work-related factors and lifestyle factors, other than physical activities, associate to a favourable prognosis of LANBP is lacking.

The multidimensional work ability model was introduced in Finland in the 1980s in order to study self-perceived work ability in relation to work-disability and health (7, 8). According to the model, self-perceived work ability is based on health and functional capacity and built on a balance between a person’s resources such as competence, values, attitudes, motivation, and



1  
2  
3 work demands. Self-perceived work ability is commonly assessed by the Work Ability Index  
4 (WAI) or by single items of the instrument (9). As, such work ability is associated with health  
5 and health related outcomes, eg depression, osteoarthritis, neck and back pain, sickness  
6 absence and general health (7, 10). Furthermore, the total WAI or single WAI items seems to  
7 be valuable for predicting sickness absence in healthy as well in unhealthy populations, with  
8 good work ability being a protective factor in all diseases studied (10-15). However, work  
9 ability in relation to the prognosis of neck/back pain is rarely studied. Nordstoga et al.,  
10 studying back pain patients referred to physiotherapy, found no association between baseline  
11 work ability and disability or pain three months later (16). Ahlström et al., followed Swedish  
12 female workers on long-term sick leave for 12 months, the majority with neck pain, and found  
13 work ability to predict the future degree of neck pain (10). In a recent study from our group,  
14 we found that poor work ability, assessed with the second WAI item (perceived mental and/or  
15 physical work ability), increased the risk of LANBP in workers with occasional neck- and/or  
16 back pain (17).

17  
18  
19  
20  
21  
22  
23  
24  
25  
26  
27  
28  
29  
30  
31  
32  
33  
34  
35  
36  
37  
38  
39  
40  
41  
42  
43  
44  
45  
46  
47  
48  
49  
50  
51  
52  
53  
54  
55  
56  
57  
58  
59  
60

Poor work ability is also associated to individual lifestyle factors such as low physical  
capacity, smoking and obesity (18). So far, we know that smoking is associated with the onset  
of neck and back pain, and with the transition from acute/subacute to long-duration back pain,  
but we do not know if being a non-smoker is associated with a favourable prognosis of  
LANBP (2, 6). If so, and considering the association between smoking and work ability,  
examine their potential interaction on the prognosis of LANBP would enhance our  
understanding and meet the demand for studies examining such interactions from reviews on  
the prognosis of neck and back pain (19, 20).

Therefore, the objective of this study was to evaluate if good self-perceived work ability and  
no daily smoking are associated with a favourable prognosis of LANBP in a working  
population, and if these exposures have a synergistic prognostic effect.

## Methods

### Design and study population

In this prospective cohort study, we used merged data from three subcohorts of the Stockholm Public Health Cohort (SPHC) (21). The SPHC consists of several public health surveys of individuals randomly selected from the adult population of Stockholm County. The first subcohort included individuals selected in 2002 and followed up in 2007, 2010 and 2014. The second cohort included individuals selected in 2006 and followed up in 2010 and 2014, and the third subcohort individuals selected in 2010 and followed up in 2014. Approximately 74,000 individuals from the subcohorts responded to the questionnaire in 2010, which was used as baseline in the present study. Of these approximately 50,000 individuals (68%) responded to the questionnaire in 2014, used as the follow-up survey in the present study. Of the responders in 2010, 39,704 were 18-61 years of age and were working since at least 12 months, representing our “working population”. We chose the age limit of 61 in 2010 to ensure that most of our population would still be working in 2014 as 65 was the norm for retirement age in Sweden at the time of the study. Figure 1 describes the inclusion of participants into the study population and the analyses sample.

Neck and back pain at baseline in 2010 were assessed with the questions; “Have you had any pain in your upper back or neck in the preceding 6 months?”, and “Have you had any pain in your lower back in the preceding 6 months?”. Both questions were followed by the question; “If yes: Do these problems limit your ability to work or carry out other daily activities?”.

Individuals answering, “Yes, on average, a few days per week or more” to at least one of the first two questions and then “Yes, to a high degree *or* to some degree” to the following question were considered as having LANBP. The questions defining LANBP incorporates

1  
2  
3 duration, frequency and the impact on daily activity and work which is recommended when  
4  
5 classifying neck and back pain (19, 22).  
6

7 Ethical approval was received from the regional ethical board in Stockholm (Dnr; 2007/545-  
8  
9 31, 2013/497-32 and 2015/1204-32).  
10  
11

## 12 13 Exposures

14  
15 The exposure “self-perceived work ability” (PWA) was categorised based on the second item  
16  
17 of the WAI (7, 9, 23). The item consists of two question, one regarding physical demands and  
18  
19 one regarding mental demands at work, respectively: “How do you rate your current work  
20  
21 ability with respect to the *physical demands/mental demands* of your work”. The response  
22  
23 alternatives were “Very good”, “Rather good”, “Moderate”, “Rather poor” and “Very poor”.  
24  
25

26  
27 The answers were dichotomized into good (very good or rather good) and poor (moderate,  
28  
29 rather poor or very poor) physical and mental work ability, respectively. Finally, PWA was  
30  
31 operationalised into three categories: good PWA (good physical *and* good mental work  
32  
33 ability), moderate PWA (good physical *or* good mental work ability, but not both) and poor  
34  
35 PWA (poor physical *and* poor mental work ability).  
36  
37

38  
39 The WAI is considered a reliable and valid instrument used in cross-national research (9, 24-  
40  
41 26). Most often, the full WAI is used in research, but also single items have been utilised as  
42  
43 measures (10-12). Lundin et al. found the second WAI item defining PWA in the present  
44  
45 study to have acceptable ability to predict sickness absence within one year in a Swedish  
46  
47 general population (27).  
48  
49

50  
51 The exposure “daily smoking” (DS) was dichotomized by the answer yes or no to the  
52  
53 question: “Do you currently smoke daily or almost daily?”.  
54  
55  
56  
57  
58  
59  
60

## Outcome

The outcome “absence of long-duration activity-limiting neck/back pain” in 2014 represents a favourable prognosis of reported problems at baseline in 2010. The definition was based on the same questions used defining the study population. Participants defined as having a favourable prognosis (cases) were those reporting no neck/back pain *or* neck/back pain not limiting their activity in daily life or at work the preceding six months. Consequently, non-cases have had pain of any duration and frequency in the neck and/or back that limited activity in daily life or at work to some or to a high degree during the preceding six months.

## Potential confounders

Potential confounders for the association between the exposure and the outcome were chosen based on literature, theoretical and clinical considerations, and availability in the questionnaire (2, 3, 6, 28). Potential confounders are presented in the Appendix. Most of the items used to measure the potential confounders have regularly been used in Swedish public health surveys since 1975, and since 2002 in the SPHC (21).

## Statistics

Stata version 14.2 (StataCorp College Station, TX, USA) were used for statistical analyses. The association between the exposures and the outcome were estimated using general linear models with a binomial distribution and a log-link and reported as risk ratio (RR) and risk difference (RD) with corresponding 95% confidence intervals (CI). The exposures, PWA and DS were assessed separately. Potential confounders were identified by reviewing the literature of prognostic factors, clinical considerations, and availability. After careful discussion about if they instead possibly could be intermediators or colliders, they were introduced into the crude models one by one. Potential confounders changing the estimated RR by 5% or more were considered confounders and were included in the final adjusted models (29, 30). DS was

1  
2  
3 tested as a confounder in the analyses with PWA as exposure and PWA was tested as a  
4  
5 confounder in the analyses with DS as exposure. A variable indicating subsample  
6  
7 participation was included in all models to adjust for potential systematic difference between  
8  
9 the subcohorts. All analyses were performed using complete cases, that is, cases with no  
10  
11 missing data. The Chi-square test was used to test a potential dose-response effect (31).  
12  
13 To calculate the potential synergistic effect of PWA and DS on the outcome, we used the  
14  
15 EpiNET's epidemiological tool (32). We dichotomised PWA into good PWA and  
16  
17 moderate/poor PWA and then combined the dichotomized PWA and DS in a dummy variable,  
18  
19 where the reference group was set to those having moderate/poor PWA and being daily  
20  
21 smokers. The dummy variable was then used as the independent factor in a crude and an  
22  
23 adjusted logistic regression. The results were presented as RR with corresponding 95% CI  
24  
25 together with the synergy index (SI) with corresponding 95% CI. A SI >1 indicates a joint  
26  
27 effect between two factors greater than the sum of their individual effects.  
28  
29  
30  
31  
32  
33

### 34 Additional analyses

35  
36 We had no information on the intensity of LANBP at baseline, which may be an important  
37  
38 confounder in the analyses. As poor self-related health may be a consequence of severe pain  
39  
40 intensity, we performed the adjusted analyses with PWA as exposure stratified by good (very  
41  
42 good/good) and poor (fair/poor/very poor) self-rated health (SRH), as a proxy for the intensity  
43  
44 of neck/back pain at baseline (33).  
45  
46  
47

48 The potential influence of attrition was assessed by comparing the prevalence of the two  
49  
50 exposures among non-responders (n=1,865) to the prevalence among responders (n=3,312)  
51  
52 using Chi-square tests.  
53  
54  
55

### 56 Patient and Public Involvement

57  
58 Patients or the public were not involved in the design or planning of the study.  
59  
60

## Results

Baseline characteristics of the study population are presented in Table 1. The mean age was 46 years (SD 10) and 66% were women. Eighty percent reported good or moderate self-perceived work ability and 84% were not smoking daily. Most participants were non-manual workers or self-employed (65%), and the majority lived together with another adult person, with or without children (77%). At follow-up in 2014, 36% of the participants showed a favourable prognosis of LANBP.

The crude and adjusted associations between self-perceived work ability, daily smoking and a favourable prognosis of LANBP are presented in Table 2. Socioeconomic status, headache/migraine and sleep disturbances were identified as confounders in the analyses with self-perceived work ability as exposure, while socioeconomic status, sleep disturbances and self-perceived work ability confounded the association between daily smoking and the outcome.

In comparison to participants with poor work ability participants with moderate or good work ability, had an adjusted RR for a favourable prognosis of 1.37 (95% CI: 1.11-1.69), and 1.80 (1.49-2.17), respectively. The corresponding adjusted RD were 0.07 (0.02-0.11) and 0.17 (0.12-0.22). Participants not smoking on daily basis had an adjusted RR of 1.21 (1.02-1.42), and an adjusted RD of 0.05 (0.01-0.10) for a favourable outcome compared to daily smokers.

The analyses with self-perceived work ability as exposure showed a significant dose-response towards a more favourable prognosis with higher work ability ( $p < 0.001$ ).

Table 3 shows the result of the evaluation of the synergistic associations between the exposures and the outcome, resulting in an adjusted SI of 0.92 (95% CI: 0.60-1.43).

## Additional results

Stratifying the analyses of the exposure self-perceived work ability by good and poor self-rated health, as a proxy for the intensity of neck/back pain at baseline, resulted in similar adjusted RR for the two strata. The RR for a favourable prognosis of LANBP when reporting moderate work ability showed a similar increase for participants with poor self-rated health and participants with good self-rated health, 1.42 (95% CI; 0.93-2.15) and 1.27 (95% CI; 0.98-1.63), compared with participants with poor work ability. The RR were also similar for those reporting good work ability in both strata, 1.72 (95% CI; 1.17-2.53) and 1.56 (95% CI; 1.23-1.96), respectively.

At baseline in 2010, non-responders had a significantly higher prevalence ( $p < 0.001$ ) of individuals with poor self-perceived work ability and daily smokers (23% and 19%) in comparison with responders (18% and 14%).

## Discussion

In this study we found an association between self-perceived work ability and a favourable prognosis of long-duration activity-limiting neck/back pain four years later. The results revealed that individuals in a working population with either good physical or good mental work ability had a 37% increased chance of a favourable prognosis of long-duration activity-limiting neck/back pain, compared to individuals with poor physical and poor mental work ability. The chance of a favourable prognosis was even higher (80%) for individuals reporting both good physical and good mental work ability. In addition, the results showed that individuals that did not smoke daily had a 21% higher chance of a favourable prognosis than did daily smokers.

A possible synergetic effect on a favourable prognosis for participants reporting good work ability and not smoke on daily basis could not be confirmed.

1  
2  
3 Previously, Nordstoga et al. found no association between baseline work ability and  
4 improvement of back pain or disability in physiotherapy patients with back pain of any  
5 duration, which contrasts with our results (16). Their study included patients with back pain  
6 of any duration, had a follow-up time of only three months, and they used the question  
7 “describe your current work ability compared with the lifetime best (0-10)” as a measure of  
8 self-perceived work ability. More in line with our result, Ahlström et al. found higher baseline  
9 work ability, defined by the same question as Nordstoga et al. and by the full WAI, to predict  
10 lower degree of neck pain at six and 12 months among women on long-term sick-leave (10).  
11 We have not found any previous study of association between smoking and a favourable  
12 prognosis, either for neck or for back pain, or on the synergetic effect of work ability and  
13 smoking.

14  
15 The mechanism for smoking to affect spinal pain is not yet well understood, but impaired  
16 blood supply, increased levels of pro-inflammatory cytokines and higher prevalence of  
17 osteoporosis due to smoking has been suggested (34). As the concept of self-perceived work  
18 ability incorporate individual factors, work-related factors and environmental factors, a  
19 specific mechanism for good self-perceived work ability to associate with a favourable  
20 prognosis of LANBP may be difficult to delineate (7).

21  
22 The present study has some possible limitations. Clustering individuals with neck and back  
23 pain when studying prognostic factors may be questioned, since prognostic factors for neck-  
24 and back pain may differ. But, as a priory analysis evaluating participants with long-duration  
25 activity-limiting neck and back pain separately, resulted in almost identical crude estimates,  
26 we decided to merge the data to increase the statistical power.

27  
28 Even though a comprehensive confounder control was performed, residual and unmeasured  
29 confounding could not be ruled out. We had no baseline information on pain intensity prior to  
30  
31  
32  
33  
34  
35  
36  
37  
38  
39  
40  
41  
42  
43  
44  
45  
46  
47  
48  
49  
50  
51  
52  
53  
54  
55  
56  
57  
58  
59  
60



1  
2  
3 inclusion into the cohort, therefore we could not consider pain intensity as a potential  
4  
5 confounder. If pain intensity at baseline is associated with the reported levels of PWA at  
6  
7 baseline, bias due to reversed causation may be present (30). Then our results may have been  
8  
9 overestimated.

10  
11  
12 However, we believe that the risk of reversed causation due to baseline pain intensity is  
13  
14 limited as individual self-perceived work ability is most likely a combination of many factors  
15  
16 other than pain, for example content, demands and organisation of work, personal attitudes,  
17  
18 motivation, knowledge and skills, and functional capacity (8). Furthermore, given that pain is  
19  
20 related to health, the additional analyses stratified by good and poor self-rated health  
21  
22 indicating that good PWA is beneficial no matter the intensity of pain also supports a low risk  
23  
24 of bias due to reversed causation.

25  
26  
27  
28 Misclassification of the outcome needs consideration. Problems to recall and to appraise  
29  
30 whether the pain during the preceding six months was activity-limiting or not may have  
31  
32 resulted in non-cases being classified as cases and vice versa. This possible misclassification  
33  
34 of the outcome is most probably non-differential potentially leading to a dilution of our results  
35  
36 (30). As the follow-up period was four years work ability and smoking status may have varied  
37  
38 across this period, and participants may have changed jobs or work assignments. If so, this  
39  
40 would probably dilute the estimation of the association.

41  
42  
43  
44 With a response rate of 64% between baseline and follow-up there is a risk of selection bias.  
45  
46 Non-responders had a significantly higher proportion of smokers and individuals with poor  
47  
48 self-perceived work ability than did responders. If most of these individuals would experience  
49  
50 a favourable prognosis of their long-duration activity-limiting neck/back pain, a scenario we  
51  
52 find unlikely, or results may be overestimated.

53  
54  
55  
56 Strengths of this study are the longitudinal design, and a relatively large sample size, allowing  
57  
58 evaluation of the outcome along categories of the exposure. However, despite a large sample,  
59  
60

1  
2  
3 the evaluation of synergetic effects may have been hampered by few cases in the reference  
4  
5 categories. The dose-response results found supports a causal association between self-  
6  
7 perceived work ability and long-duration activity-limiting neck/back pain, and the extensive  
8  
9 confounder control supports internal validity. We also regard the incorporation of activity  
10  
11 limitations in the definition of the baseline pain and in the outcome as a strength. Activity  
12  
13 limitations is recommended to be included in measures for chronic pain, recognised to be of  
14  
15 clinical importance, and to have negative consequences for the affected individual and for the  
16  
17 society (1, 5, 19, 22, 35).  
18  
19  
20

21 To our knowledge this is the first study assessing self-perceived work ability and smoking  
22  
23 focusing on a favourable prognosis of long-duration activity-limiting neck/back pain. Even  
24  
25 though more research is needed to confirm our findings, they imply that good work ability  
26  
27 and not smoking daily appears to predict a favourable prognosis of long-duration activity-  
28  
29 limiting neck/back pain. Thus, interventions to improve physical and mental work ability and  
30  
31 reduce smoking may enhance the chance for a favourable prognosis in workers with long-  
32  
33 duration activity-limiting neck/back pain. Therefore, further research focusing on such  
34  
35 interventions is motivated. Such interventions could be directed towards both the workplace  
36  
37 organisation and the individual, possibly resulting in reduced human suffering and societal  
38  
39 costs.  
40  
41  
42  
43  
44

## 45 Conclusion

46  
47  
48 Having a good physical and/or mental self-perceived work ability as well as not smoking on  
49  
50 daily basis is associated to a favourable prognosis in a working population with long-duration  
51  
52 activity-limiting neck/back pain. However, fulfilling both criteria seem to have no synergistic  
53  
54 prognostic effect.  
55  
56  
57  
58  
59  
60

## Acknowledgement

Thanks to Peeter Fredlund, Research Statistician at Karolinska Institutet and SLL Centre for Epidemiology and Community Medicine, Stockholm, for providing us with the data.

## Contributors

TB, LWH, ML and ES contributed to the conceptualisation and methodology of the study. JH approved the conceptualisation and method and provided the data resources. Based on a protocol approved by all authors TB made the statistical analyses and wrote the first draft of the manuscript. All authors contributed to the interpretation of the results and critically revised the manuscript and approved the last manuscript version.

## Funding

This study was supported by AFA Insurance, grant number 170095. The funders had no role in study design, data collection and analysis, decision to publish, or preparation of the manuscript.

## Competing interests

Non to declare.

## Data availability statement

Data are available upon reasonable request. Due to ethical restrictions and laws (GDPR) of disclosing personal data, authors have to seek permission to allow us to make the data used in this study available. Data will be available upon request after permission is granted from the Karolinska Institutet's Ethics Review Board in Stockholm. Inquiries for data access should first be sent to [eva.skillgate@ki.se](mailto:eva.skillgate@ki.se), who will then contact the ethics board for permission to openly share the data.

## References

1. Vos T, Abajobir AA, Abate KH, et al. Global, regional, and national incidence, prevalence, and years lived with disability for 328 diseases and injuries for 195 countries, 1990–2016: a systematic analysis for the Global Burden of Disease Study 2016. *The Lancet*. 2017;390(10100):1211-59.
2. Hartvigsen J, Hancock MJ, Kongsted A, et al. What low back pain is and why we need to pay attention. *The Lancet*. 2018;391(10137):2356-67.
3. Hoy DG, Protani M, De R, Buchbinder R. The epidemiology of neck pain. *Best Pract Res Clin Rheumatol*. 2010;24(6):783-92.
4. Cochrane A, Higgins NM, Rothwell C, et al. Work Outcomes in Patients Who Stay at Work Despite Musculoskeletal Pain. *J Occup Rehabil*. 2018;28(3):559-67.
5. Schofield DJ, Shrestha RN, Percival R, Callander EJ, Kelly SJ, Passey ME. Early retirement and the financial assets of individuals with back problems. *Eur Spine J*. 2011;20(5):731-6.
6. Green BN, Johnson CD, Haldeman S, et al. A scoping review of biopsychosocial risk factors and co-morbidities for common spinal disorders. *PLoS One*. 2018;13(6):e0197987.

- 1  
2  
3 7. Gould R, Ilmarinen J, Järvisalo J, Koskinen S. Dimensions of Work Ability.  
4  
5 Results of the 2000 Health Survey. Vaasa: Waasa Graphics Oy; 2008.  
6
- 7  
8 8. Ilmarinen J. Work ability, a comprehensive concept for occupational health  
9  
10 research and prevention. *Scand J Work Environ Health*. 2009;35(1):1-5.  
11
- 12  
13 9. Ilmarinen J. The Work Ability Index (WAI). *Occupational Medicine*.  
14  
15 2006;57(2):160.  
16
- 17  
18 10. Ahlstrom L, Grimby-Ekman A, Hagberg M, Dellve L. The work ability index  
19  
20 and single-item question: associations with sick leave, symptoms, and health – a prospective  
21  
22 study of women on long-term sick leave. *Scand J Work Environ Health*. 2010;36(5):404-12.  
23
- 24  
25 11. Kinnunen U, Natti J. Work ability score and future work ability as predictors of  
26  
27 register-based disability pension and long-term sickness absence: A three-year follow-up  
28  
29 study. *Scand J Public Health*. 2018;46(3):321-30.  
30
- 31  
32 12. Lundin A, Kjellberg K, Leijon O, Punnett L, Hemmingsson T. The Association  
33  
34 Between Self-Assessed Future Work Ability and Long-Term Sickness Absence, Disability  
35  
36 Pension and Unemployment in a General Working Population: A 7-Year Follow-Up Study. *J*  
37  
38 *Occup Rehabil*. 2016;26(2):195-203.  
39
- 40  
41 13. Reeuwijk KG, Robroek SJ, Niessen MA, Kraaijenhagen RA, Vergouwe Y,  
42  
43 Burdorf A. The Prognostic Value of the Work Ability Index for Sickness Absence among  
44  
45 Office Workers. *PLoS One*. 2015;10(5):e0126969.  
46
- 47  
48 14. Sundstrup E, Jakobsen MD, Mortensen OS, Andersen LL. Joint association of  
49  
50 multimorbidity and work ability with risk of long-term sickness absence: a prospective cohort  
51  
52 study with register follow-up. *Scand J Work Environ Health*. 2017;43(2):146-54.  
53
- 54  
55 15. Vingard E, Lindberg P, Josephson M, et al. Long-term sick-listing among  
56  
57 women in the public sector and its associations with age, social situation, lifestyle, and work  
58  
59 factors: a three-year follow-up study. *Scand J Public Health*. 2005;33(5):370-5.  
60

- 1  
2  
3 16. Nordstoga AL, Vasseljen O, Meisingset I, Nilsen TIL, Unsgaard-Tondel M.  
4  
5 Improvement in Work Ability, Psychological Distress and Pain Sites in Relation to Low Back  
6  
7 Pain Prognosis: A Longitudinal Observational Study in Primary Care. *Spine (Phila Pa 1976)*.  
8  
9 2019;44(7):E423-e9.  
10  
11
- 12 17. Holm LW, Bohman T, Lekander M, Magnusson C, Skillgate E. Risk of  
13  
14 transition from occasional neck/back pain to long-duration activity limiting neck/back pain: a  
15  
16 cohort study on the influence of poor work ability and sleep disturbances in the working  
17  
18 population in Stockholm County. *BMJ Open*. 2020;10(6):e033946.  
19  
20
- 21 18. van den Berg TI, Elders LA, de Zwart BC, Burdorf A. The effects of work-  
22  
23 related and individual factors on the Work Ability Index: a systematic review. *Occup Environ*  
24  
25 *Med*. 2009;66(4):211-20.  
26  
27
- 28 19. Supplement article: Carroll LJ, Hurwitz EL, Cote P, et al. Research priorities  
29  
30 and methodological implications: the Bone and Joint Decade 2000-2010 Task Force on Neck  
31  
32 Pain and Its Associated Disorders. *Spine*. 2008;33(4 Suppl):S214-20.  
33  
34
- 35 20. Hayden JA, Dunn KM, van der Windt DA, Shaw WS. What is the prognosis of  
36  
37 back pain? *Best Pract Res Clin Rheumatol*. 2010;24(2):167-79.  
38  
39
- 40 21. Svensson AC, Fredlund P, Laflamme L, et al. Cohort profile: The Stockholm  
41  
42 Public Health Cohort. *Int J Epidemiol*. 2013;42(5):1263-72.  
43  
44
- 45 22. Dionne CE, Dunn KM, Croft PR, et al. A consensus approach toward the  
46  
47 standardization of back pain definitions for use in prevalence studies. *Spine (Phila Pa 1976)*.  
48  
49 2008;33(1):95-103.  
50  
51
- 52 23. Tuomi K, Ilmarinen J, Jahkola A, Katajarinne L, Tulkki A. Work ability index.  
53  
54 2 ed. Helsinki: Finnish Institute of Occupational Health; 1998.  
55  
56  
57  
58  
59  
60

- 1  
2  
3 24. Alavinia SM, de Boer AG, van Duivenbooden JC, Frings-Dresen MH, Burdorf  
4  
5 A. Determinants of work ability and its predictive value for disability. *Occup Med (Lond)*.  
6  
7 2009;59(1):32-7.  
8  
9  
10 25. de Zwart BCH, Frings-Dresen MHW, van Duivenbooden JC. Test-retest  
11  
12 reliability of the Work Ability Index questionnaire. *Occupational Medicine*. 2002;52(4):177-  
13  
14 81.  
15  
16 26. Radkiewicz P, Widerszal-Bazyl M. Psychometric properties of Work Ability  
17  
18 Index in the light of comparative survey study. *International Congress Series*. 2005;1280:304-  
19  
20 9.  
21  
22  
23 27. Lundin A, Leijon O, Vaez M, Hallgren M, Torgén M. Predictive validity of the  
24  
25 Work Ability Index and its individual items in the general population. *Scand J Public Health*.  
26  
27 2017;45(4):350-6.  
28  
29  
30 28. Verkerk K, Luijsterburg PA, Miedema HS, Pool-Goudzwaard A, Koes BW.  
31  
32 Prognostic factors for recovery in chronic nonspecific low back pain: a systematic review.  
33  
34 *Phys Ther*. 2012;92(9):1093-108.  
35  
36  
37 29. Mickey RM, Greenland S. The impact of confounder selection criteria on effect  
38  
39 estimation. *Am J Epidemiol*. 1989;129(1):125-37.  
40  
41  
42 30. Rothman KJ, Greenland S, Lash TL. *Modern epidemiology*. 3rd ed.  
43  
44 Philadelphia: Wolters Kluwer Health/Lippincott Williams & Wilkins; 2008. x, 758 p.  
45  
46  
47 31. Vittinghoff E, Glidden DV, Shiboski SC, McCulloch CE. *Regression Methods*  
48  
49 *in Biostatistics, Linear, Logistic, Survival, and Repeated Measures Models*. 2nd ed. New  
50  
51 York, USA: Springer New York; 2012.  
52  
53  
54 32. Andersson T, Alfredsson L, Kallberg H, Zdravkovic S, Ahlbom A. Calculating  
55  
56 measures of biological interaction. *Eur J Epidemiol*. 2005;20(7):575-9.  
57  
58  
59  
60

- 1  
2  
3 33. Perruccio AV, Power JD, Badley EM. Arthritis onset and worsening self-rated  
4 health: a longitudinal evaluation of the role of pain and activity limitations. *Arthritis Rheum.*  
5 2005;53(4):571-7  
6  
7  
8  
9  
10 34. Shiri R, Karppinen J, Leino-Arjas P, Solovieva S, Viikari-Juntura E. The  
11 association between smoking and low back pain: a meta-analysis. *Am J Med.* 2010;123(1):87  
12 e7-35.  
13  
14  
15  
16 35. Dworkin RH, Turk DC, Farrar JT, et al. Core outcome measures for chronic  
17 pain clinical trials: IMMPACT recommendations. *Pain.* 2005;113(1-2):9-19.  
18  
19  
20  
21  
22  
23  
24  
25  
26  
27  
28  
29  
30  
31  
32  
33  
34  
35  
36  
37  
38  
39  
40  
41  
42  
43  
44  
45  
46  
47  
48  
49  
50  
51  
52  
53  
54  
55  
56  
57  
58  
59  
60



**Table 1** Baseline characteristics by the exposures perceived work ability (PWA) and daily smoking (DS). Total study population, n = 5,177.

| Baseline characteristics       | Perceived work ability |            |            |            | Daily smoking |          |
|--------------------------------|------------------------|------------|------------|------------|---------------|----------|
|                                | All                    | Good       | Moderate   | Poor       | No            | Yes      |
|                                | n (%)                  | n (%)      | n (%)      | n (%)      | n (%)         | n (%)    |
|                                | 5,177                  | 3,076 (59) | 1,080 (21) | 1,021 (20) | 4,320 (84)    | 818 (16) |
| <b>Sex</b>                     |                        |            |            |            |               |          |
| Women                          | 3,396 (66)             | 1,974 (64) | 734 (68)   | 688 (67)   | 2,840 (66)    | 534 (65) |
| <b>Average age, years (SD)</b> | 46 (10)                | 45 (10)    | 46 (10)    | 47 (10)    | 45 (10)       | 47 (10)  |
| <b>Perceived work ability</b>  |                        |            |            |            |               |          |
| Good                           |                        |            |            |            | 2,679 (62)    | 377 (46) |
| Moderate                       |                        |            |            |            | 888 (21)      | 186 (23) |
| Poor                           |                        |            |            |            | 753 (17)      | 255 (31) |
| <b>Daily smoking - Yes</b>     | 818 (16)               | 377 (12)   | 186 (17)   | 255 (25)   |               |          |
| <b>BMI</b>                     |                        |            |            |            |               |          |
| Under weight                   | 60 (1)                 | 43 (1)     | 8 (1)      | 9 (1)      | 50 (1)        | 9 (1)    |

|                                               |            |            |          |          |            |          |
|-----------------------------------------------|------------|------------|----------|----------|------------|----------|
| Normal weight                                 | 2,428 (48) | 1,507 (50) | 522 (50) | 399 (40) | 2,043 (48) | 374 (47) |
| Overweight                                    | 1,814 (36) | 1,074 (36) | 360 (34) | 380 (38) | 1,502 (36) | 291 (37) |
| Obese                                         | 747 (15)   | 383 (13)   | 162 (15) | 202 (21) | 620 (15)   | 122 (15) |
| <b>Socioeconomic status</b>                   |            |            |          |          |            |          |
| Unskilled/semiskilled worker                  | 955 (20)   | 435 (15)   | 219 (22) | 301 (32) | 712 (17)   | 236 (30) |
| Skilled worker                                | 749 (15)   | 393 (13)   | 173 (17) | 183 (20) | 566 (14)   | 174 (22) |
| Low level non-manual employees                | 722 (15)   | 465 (16)   | 137 (13) | 120 (13) | 603 (15)   | 115 (15) |
| Middle level non-manual employees             | 1,241 (25) | 806 (27)   | 255 (25) | 180 (19) | 1,111 (27) | 124 (16) |
| High level non-manual employees/self-employed | 755 (15)   | 543 (19)   | 133 (13) | 79 (8)   | 692 (17)   | 58 (8)   |
| Self-employed (other than high level)         | 488 (10)   | 306 (10)   | 105 (10) | 77 (8)   | 411 (10)   | 73 (9)   |
| <b>Household</b>                              |            |            |          |          |            |          |
| Living with adult, with/without children      | 3,939 (77) | 2,463 (81) | 791 (74) | 685 (68) | 3,361 (78) | 555 (68) |
| Living alone                                  | 817 (16)   | 410 (13)   | 197 (18) | 210 (21) | 629 (15)   | 178 (22) |
| Living with children only                     | 381 (7)    | 191 (6)    | 80 (8)   | 110 (11) | 299 (7)    | 80 (10)  |
| <b>Headache/migraine - Yes</b>                | 2,517 (50) | 1,330 (44) | 556 (53) | 631 (66) | 2,084 (50) | 416 (53) |
| <b>Psychological distress</b>                 |            |            |          |          |            |          |

|                                                      |            |            |          |          |            |          |
|------------------------------------------------------|------------|------------|----------|----------|------------|----------|
| No                                                   | 3,381 (66) | 2,403 (78) | 596 (56) | 382 (38) | 2,876 (67) | 479 (59) |
| Mild                                                 | 978 (19)   | 456 (15)   | 259 (24) | 263 (26) | 801 (19)   | 169 (21) |
| Severe                                               | 793 (15)   | 207 (7)    | 217 (20) | 369 (36) | 622 (14)   | 167 (20) |
| <b>Personal support - No</b>                         | 885 (17)   | 359 (12)   | 219 (20) | 307 (30) | 698 (16)   | 182 (22) |
| <b>Sleep disturbances - Yes</b>                      | 2,621 (51) | 1,254 (42) | 623 (59) | 744 (76) | 2,120 (50) | 480 (61) |
| <b>Sedentary leisure time</b>                        |            |            |          |          |            |          |
| <2 hours/day                                         | 2,844 (55) | 1,082 (59) | 540 (50) | 502 (50) | 2,441 (57) | 385 (48) |
| 2-3 hours/day                                        | 1,458 (29) | 854 (28)   | 340 (32) | 264 (26) | 1,200 (28) | 248 (31) |
| >3 hours/day                                         | 840 (16)   | 399 (13)   | 196 (18) | 245 (20) | 654 (15)   | 177 (22) |
| <b>Leisure physical activity, moderate intensity</b> |            |            |          |          |            |          |
| <20 minutes/day                                      | 1,802 (35) | 977 (32)   | 389 (36) | 436 (43) | 1,435 (34) | 352 (44) |
| 20-40 minutes/day                                    | 1,944 (38) | 1,208 (40) | 399 (37) | 337 (34) | 1,682 (39) | 248 (31) |
| >40 minutes/day                                      | 1,379 (27) | 865 (28)   | 284 (27) | 230 (23) | 1,169 (27) | 203 (25) |
| <b>Leisure physical activity, high intensity</b>     |            |            |          |          |            |          |
| <1 hour/week                                         | 2,395 (47) | 1,301 (43) | 532 (50) | 562 (56) | 1,883 (44) | 495 (61) |
| 1-2 hours/week                                       | 1,371 (27) | 842 (27)   | 294 (27) | 235 (23) | 1,200 (28) | 158 (20) |

|                                |            |            |          |          |            |          |
|--------------------------------|------------|------------|----------|----------|------------|----------|
| >2 hours/week                  | 1,366 (26) | 911 (30)   | 246 (23) | 209 (21) | 1,204 (28) | 155 (19) |
| <b>Physical workload</b>       |            |            |          |          |            |          |
| Sedentary at least 50%         | 2,789 (55) | 1,801 (60) | 537 (51) | 448 (46) | 2,410 (57) | 361 (46) |
| Standing/walking/some lifting  | 1,377 (26) | 727 (24)   | 291 (27) | 319 (33) | 1,094 (26) | 230 (29) |
| Walking/lifting/heavy work     | 937 (19)   | 496 (16)   | 232 (22) | 209 (21) | 738 (17)   | 191 (25) |
| <b>Subsample participation</b> |            |            |          |          |            |          |
| 2002/2007/2010/2014            | 1,283 (25) | 781 (25)   | 269 (25) | 233 (23) | 1,106 (26) | 170 (21) |
| 2006/2010/2014                 | 1,706 (33) | 1,011 (33) | 352 (33) | 346 (34) | 1,432 (33) | 268 (33) |
| 2010/2014                      | 2,185 (42) | 1,284 (42) | 459 (42) | 442 (43) | 1,782 (41) | 380 (46) |
| <b>Self-rated health</b>       |            |            |          |          |            |          |
| Very good                      | 328 (6)    | 293 (9)    | 23 (2)   | 12 (1)   | 302 (7)    | 26 (3)   |
| Good                           | 2,282 (44) | 1,801 (59) | 336 (32) | 145 (14) | 1,982 (46) | 286 (35) |
| Fair                           | 1,980 (39) | 877 (29)   | 567 (53) | 536 (53) | 1,585 (37) | 376 (46) |
| Poor or very poor              | 538 (11)   | 82 (3)     | 137 (13) | 319 (32) | 408 (10)   | 125 (16) |

**Note:** Numbers may differ due to internal missing. For a description of the variables and their categorisation see the Appendix.

**Table 2** Associations\* between the exposures perceived work ability (PWA) and daily smoking (DS) in 2010, and a favourable prognosis of long-duration activity-limiting neck and/or back pain in 2014.

| Exposure                      | Cases/total | Crude |           | Adjusted          |           | Adjusted          |           |
|-------------------------------|-------------|-------|-----------|-------------------|-----------|-------------------|-----------|
|                               |             | RR    | 95% CI    | RR                | 95% CI    | RD                | 95% CI    |
| <b>Perceived work ability</b> |             |       |           |                   |           |                   |           |
| (n = 3,312)                   |             |       |           |                   |           |                   |           |
| Poor                          | 115/596     | 1     |           | 1                 |           | 0                 |           |
| Moderate                      | 203/688     | 1.53  | 1.25-1.87 | 1.37 <sup>a</sup> | 1.11-1.69 | 0.07 <sup>a</sup> | 0.02-0.11 |
| Good                          | 873/2,028   | 2.23  | 1.88-2.65 | 1.80 <sup>a</sup> | 1.49-2.17 | 0.17 <sup>a</sup> | 0.12-0.22 |
| <b>Daily smoking</b>          |             |       |           |                   |           |                   |           |
| (n = 3,292)                   |             |       |           |                   |           |                   |           |
| Yes                           | 115/459     | 1     |           | 1                 |           | 0                 |           |
| No                            | 1,070/2,833 | 1.51  | 1.28-1.78 | 1.21 <sup>b</sup> | 1.02-1.42 | 0.05 <sup>b</sup> | 0.01-0.10 |

**Note:** \*General linear models with a binomial distribution and a log-link, estimating the risk ratio (RR), or an identity-link, estimating the risk difference (RD), with corresponding 95% confidence intervals (CI).

<sup>a</sup>Adjusted for socioeconomic status, headache/migraine, sleep disturbances and subsample participation; <sup>b</sup>Adjusted for socioeconomic status, sleep disturbances, perceived work ability and subsample participation.

**Table 3** Analyses\* of the potential synergistic effects of the two exposures perceived work ability (PWA) and daily smoking (DS), on a favourable prognosis of long-duration activity-limiting neck and/or back pain.

| Exposure                                                  | Cases/total | Crude |           | Adjusted <sup>a</sup> |           |
|-----------------------------------------------------------|-------------|-------|-----------|-----------------------|-----------|
|                                                           |             | RR    | 95% CI    | RR                    | 95% CI    |
| Moderate/poor perceived work ability and daily smoking    | 39/253      | 1     |           | 1                     |           |
| Moderate/poor perceived work ability and no daily smoking | 276/1,022   | 1.88  | 1.32-2.66 | 1.61                  | 1.11-2.34 |
| Good perceived work ability and daily smoking             | 76/206      | 2.96  | 1.93-4.54 | 2.33                  | 1.49-3.66 |
| Good perceived work ability and no daily smoking          | 794/1,811   | 3.96  | 2.84-5.52 | 2.80                  | 1.95-4.02 |
| Synergy index                                             |             |       |           | 0.92                  | 0.60-1.43 |

\*Using EpiNET's epidemiological tool "Epinetcaculation.xlsx" based on the results from logistic regressions.

<sup>a</sup>Adjusted for socioeconomic status, headache/migraine, sleep disturbances and subsample participation.

**Abbreviations:** RR; risk ratio, CI; confidence interval.

1  
2  
3  
4 **Figure legends**  
5

6  
7 **Figure 1** Flow chart describing the inclusion of participants into the study population and the  
8  
9 analyses sample. NP; neck pain, BP; low back pain, PWA; perceived work ability.  
10  
11  
12  
13  
14  
15  
16  
17  
18  
19  
20  
21  
22  
23  
24  
25  
26  
27  
28  
29  
30  
31  
32  
33  
34  
35  
36  
37  
38  
39  
40  
41  
42  
43  
44  
45  
46  
47  
48  
49  
50  
51  
52  
53  
54  
55  
56  
57  
58  
59  
60

For peer review only

1  
2  
3  
4  
5  
6  
7  
8  
9  
10  
11  
12  
13  
14  
15  
16  
17  
18  
19  
20  
21  
22  
23  
24  
25  
26  
27  
28  
29  
30  
31  
32  
33  
34  
35  
36  
37  
38  
39  
40  
41  
42  
43  
44  
45  
46  
47  
48  
49  
50  
51  
52  
53  
54  
55  
56  
57  
58  
59  
60

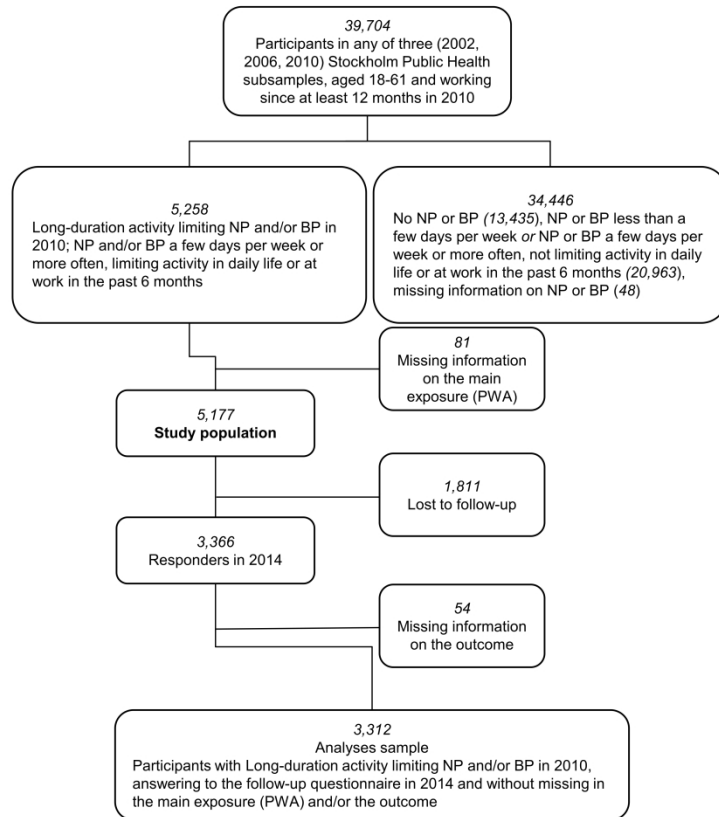

Figure 1. Flow chart describing the inclusion of participants into the study population and the analyses sample. NP; neck pain, BP; low back pain, PWA; perceived work ability.

383x511mm (300 x 300 DPI)



## Appendix Potential confounding factors.

| Potential confounder                     | Measurement                                                                                                                               | Categorisation in the analyses                                                                                                                                                                        |
|------------------------------------------|-------------------------------------------------------------------------------------------------------------------------------------------|-------------------------------------------------------------------------------------------------------------------------------------------------------------------------------------------------------|
| Daily smoking <sup>a</sup>               | "Do you currently smoke daily or almost daily?"                                                                                           | No, yes                                                                                                                                                                                               |
| Self-perceived work ability <sup>b</sup> | "How do you rate your current work ability with respect to the physical demands/mental demands of your work"                              | Good, moderate and poor                                                                                                                                                                               |
| Sex                                      | Sex at baseline 2010                                                                                                                      | Men, women (no other alternatives available)                                                                                                                                                          |
| Age                                      | Age at baseline 2010                                                                                                                      | Continuous and in quartiles (18-38), (39-46), (47-54), (55-61)                                                                                                                                        |
| Body mass index (BMI)                    | Weight/height <sup>2</sup> (kg/m <sup>2</sup> )                                                                                           | Categorical; underweight (<18.5), normal weight (18.5-24.9), overweight (25-29.9), obese (≥30)                                                                                                        |
| Socioeconomic status (SES)               | According to the classification from Statistics Sweden. Based on current occupation and education for the economically active population. | Unskilled/semiskilled worker, skilled worker, low level non-manual employees, middle level non-manual employees, high level non-manual employees/self-employed, self-employed (other than high level) |
| Household                                | "Do you live together with someone?"                                                                                                      | Categorical; living together with adult/s and child/ren, living alone, living with child/children only                                                                                                |
| Headache/migraine                        | "Do you have headache or migraine?"                                                                                                       | No, yes; somewhat or severe                                                                                                                                                                           |
| Psychological distress <sup>1, 2</sup>   | Based on the 12-item General Health Questionnaire (GHQ-12), using the scoring system 0-0-1-1.                                             | No (0-2), mild (3-6), severe (7-12)                                                                                                                                                                   |
| Personal support <sup>2, 3</sup>         | "Do you know persons who can provide you with personal support for personal problems or crises in your life?"                             | No-usually not or never, yes-always or for the most part                                                                                                                                              |
| Sleep disturbances                       | "Do you have sleep disturbances"                                                                                                          | No, yes; somewhat or severe                                                                                                                                                                           |

|                                           |                                                |                                                                                                                                                                                                              |                                                                                                    |
|-------------------------------------------|------------------------------------------------|--------------------------------------------------------------------------------------------------------------------------------------------------------------------------------------------------------------|----------------------------------------------------------------------------------------------------|
| 1<br>2<br>3<br>4<br>5<br>6<br>7<br>8<br>9 | Sedentary leisure time                         | “Refer to your leisure physical activity during the past 12 months? If the activities vary during the year and during a week, refer to an average.” Sitting/watching TV/reading during leisure time.         | Categorical: less than 2 hours/day, 2-3 hours/day, more than 3 hours/day                           |
| 10<br>11<br>12<br>13<br>14                | Leisure physical activity - moderate intensity | “Refer to your leisure physical activity during the past 12 months? If the activities vary during the year and during a week, refer to an average.” Walking/biking during leisure time.                      | Categorical: less than 20 minutes/day, 20-40 minutes/day, more than 40 minutes/day                 |
| 15<br>16<br>17<br>18<br>19<br>20<br>21    | Leisure physical activity - high intensity     | Refer to your leisure physical activity during the past 12 months? If the activities vary during the year and during a week, refer to an average.” Exercise, other than walking/biking, during leisure time. | Categorical: less than 1 hour/week, 1-2 hours/week, more than 2 hours/week                         |
| 22<br>23<br>24<br>25<br>26                | Physical workload <sup>d</sup>                 | “Refer to your physical activity during your daily activity and/or work during the past 12 months? If the activity vary during the year and during a week, refer to an average.                              | Categorical; sedentary at least to 50 %, standing/walking/some lifting, walking/lifting/heavy work |
| 27<br>28<br>29<br>30                      | Subsample participation <sup>e</sup>           | Refers to the subsample of the Stockholm Public Health Cohort the participants belonged to.                                                                                                                  | Categorical: 2002/2007/2010/2014, 2006/2010/2014, 2010/2014                                        |

<sup>a</sup> Daily smoking was assessed as a potential confounder in the analyses with self-perceived work ability as exposure. <sup>b</sup> Self-perceived work ability was assessed as a potential confounder in the analyses with daily smoking as exposure. <sup>c</sup> Subsample participation was included in all adjusted models order to adjust for potential systematic difference between the subsamples. <sup>d</sup> Bibliographical references to definition and psychometric properties of the factors.

1. Goldberg DP, Gater R, Sartorius N, Ustun TB, Piccinelli M, Gureje O, et al. The validity of two versions of the GHQ in the WHO study of mental illness in general health care. *Psychol Med.* 1997;27(1):191-7.
2. McDowell I. *Measuring health a guide to rating scales and questionnaires.* 3rd ed. New York ; Oxford: Oxford University Press; 2006. xvi, 748 p.
3. Uden AL, Orth-Gomer K. Development of a social support instrument for use in population surveys. *Soc Sci Med.* 1989;29(12):1387-92.

1  
2  
3  
4  
5  
6  
7  
8  
9  
10  
11  
12  
13  
14  
15  
16  
17  
18  
19  
20  
21  
22  
23  
24  
25  
26  
27  
28  
29  
30  
31  
32  
33  
34  
35  
36  
37  
38  
39  
40  
41  
42  
43  
44  
45  
46  
47

4. Leijon O, Wiktorin C, Harenstam A, Karlqvist L. Validity of a self-administered questionnaire for assessing physical work loads in a general population. *J Occup Environ Med.* 2002;44(8):724-35.

For peer review only

STROBE Statement—Checklist of items that should be included in reports of *cohort studies*

|                              | Item No | Recommendation                                                                                                                                                                                                                                                                                                                                                                                                                                                                               |
|------------------------------|---------|----------------------------------------------------------------------------------------------------------------------------------------------------------------------------------------------------------------------------------------------------------------------------------------------------------------------------------------------------------------------------------------------------------------------------------------------------------------------------------------------|
| <b>Title and abstract</b>    | 1       | (a) Indicate the study's design with a commonly used term in the title or the abstract<br><b>Page 1, line 3</b><br>(b) Provide in the abstract an informative and balanced summary of what was done and what was found <b>Page 2 -4</b>                                                                                                                                                                                                                                                      |
| <b>Introduction</b>          |         |                                                                                                                                                                                                                                                                                                                                                                                                                                                                                              |
| Background/rationale         | 2       | Explain the scientific background and rationale for the investigation being reported<br><b>Page 5 and 6</b>                                                                                                                                                                                                                                                                                                                                                                                  |
| Objectives                   | 3       | State specific objectives, including any prespecified hypotheses<br><b>Page 6, line 115-117</b>                                                                                                                                                                                                                                                                                                                                                                                              |
| <b>Methods</b>               |         |                                                                                                                                                                                                                                                                                                                                                                                                                                                                                              |
| Study design                 | 4       | Present key elements of study design early in the paper <b>Page 7, line 119-125</b>                                                                                                                                                                                                                                                                                                                                                                                                          |
| Setting                      | 5       | Describe the setting, locations, and relevant dates, including periods of recruitment, exposure, follow-up, and data collection <b>Page 7, line 120-128, and Figure 1</b>                                                                                                                                                                                                                                                                                                                    |
| Participants                 | 6       | (a) Give the eligibility criteria, and the sources and methods of selection of participants. Describe methods of follow-up <b>Page 7, line 120-133, and Figure 1</b><br>(b) For matched studies, give matching criteria and number of exposed and unexposed <b>N/A</b>                                                                                                                                                                                                                       |
| Variables                    | 7       | Clearly define all outcomes, exposures, predictors, potential confounders, and effect modifiers. Give diagnostic criteria, if applicable <b>Page 7-9, line 134-176, and Appendix</b>                                                                                                                                                                                                                                                                                                         |
| Data sources/<br>measurement | 8*      | For each variable of interest, give sources of data and details of methods of assessment (measurement). Describe comparability of assessment methods if there is more than one group <b>Page 7-9, line 134-176, and Page 10, line 201-208, plus Appendix</b>                                                                                                                                                                                                                                 |
| Bias                         | 9       | Describe any efforts to address potential sources of bias<br><b>Page 9, line 182-190 (confounding), Page 10, line 200-208 (Additional analyses)</b>                                                                                                                                                                                                                                                                                                                                          |
| Study size                   | 10      | Explain how the study size was arrived at <b>Page 7, line 125-129. Figure 1. Page 10 line 190-191.</b>                                                                                                                                                                                                                                                                                                                                                                                       |
| Quantitative variables       | 11      | Explain how quantitative variables were handled in the analyses. If applicable, describe which groupings were chosen and why <b>Page 8-9, line 145-176. Page 10, line 200-208. Appendix.</b>                                                                                                                                                                                                                                                                                                 |
| Statistical methods          | 12      | (a) Describe all statistical methods, including those used to control for confounding<br><b>Page 9 and 10, line 177-208</b><br>(b) Describe any methods used to examine subgroups and interactions<br><b>Page 10, line 192-208</b><br>(c) Explain how missing data were addressed<br><b>Page 10, line 190-191</b><br>(d) If applicable, explain how loss to follow-up was addressed<br><b>Page 10, line 206-208</b><br>(e) Describe any sensitivity analyses<br><b>Page 10, line 200-208</b> |
| <b>Results</b>               |         |                                                                                                                                                                                                                                                                                                                                                                                                                                                                                              |
| Participants                 | 13*     | (a) Report numbers of individuals at each stage of study—eg numbers potentially eligible, examined for eligibility, confirmed eligible, included in the study, completing follow-up, and analysed <b>Figure 1</b>                                                                                                                                                                                                                                                                            |

|                          |     |                                                                                                                                                                                                                                                                |
|--------------------------|-----|----------------------------------------------------------------------------------------------------------------------------------------------------------------------------------------------------------------------------------------------------------------|
|                          |     | (b) Give reasons for non-participation at each stage <b>Figure 1</b>                                                                                                                                                                                           |
|                          |     | (c) Consider use of a flow diagram <b>Figure 1</b>                                                                                                                                                                                                             |
| Descriptive data         | 14* | (a) Give characteristics of study participants (eg demographic, clinical, social) and information on exposures and potential confounders <b>Table 1</b>                                                                                                        |
|                          |     | (b) Indicate number of participants with missing data for each variable of interest <b>Table 1 and Figure 1</b>                                                                                                                                                |
|                          |     | (c) Summarise follow-up time (eg, average and total amount) <b>N/A</b>                                                                                                                                                                                         |
| Outcome data             | 15* | Report numbers of outcome events or summary measures over time <b>Page 11, line 216-217. Table 2</b>                                                                                                                                                           |
| Main results             | 16  | (a) Give unadjusted estimates and, if applicable, confounder-adjusted estimates and their precision (eg, 95% confidence interval). Make clear which confounders were adjusted for and why they were included <b>Page 11, line 218-232. Table 2 and Table 3</b> |
|                          |     | (b) Report category boundaries when continuous variables were categorized <b>Appendix</b>                                                                                                                                                                      |
|                          |     | (c) If relevant, consider translating estimates of relative risk into absolute risk for a meaningful time period <b>Page 11 line 224-228, Table 2</b>                                                                                                          |
| Other analyses           | 17  | Report other analyses done—eg analyses of subgroups and interactions, and sensitivity analyses <b>Page 11, line 231-232. Page 12, line 233-244. Table 3.</b>                                                                                                   |
| <b>Discussion</b>        |     |                                                                                                                                                                                                                                                                |
| Key results              | 18  | Summarise key results with reference to study objectives <b>Page 12, line 246-256</b>                                                                                                                                                                          |
| Limitations              | 19  | Discuss limitations of the study, taking into account sources of potential bias or imprecision. Discuss both direction and magnitude of any potential bias <b>Page 13-14, line 274-303</b>                                                                     |
| Interpretation           | 20  | Give a cautious overall interpretation of results considering objectives, limitations, multiplicity of analyses, results from similar studies, and other relevant evidence <b>Page 15, line 314-323</b>                                                        |
| Generalisability         | 21  | Discuss the generalisability (external validity) of the study results <b>Page 15, line 314-323 and Conclusion</b>                                                                                                                                              |
| <b>Other information</b> |     |                                                                                                                                                                                                                                                                |
| Funding                  | 22  | Give the source of funding and the role of the funders for the present study and, if applicable, for the original study on which the present article is based <b>Page 16, line 338-341</b>                                                                     |

\*Give information separately for exposed and unexposed groups.

**Note:** An Explanation and Elaboration article discusses each checklist item and gives methodological background and published examples of transparent reporting. The STROBE checklist is best used in conjunction with this article (freely available on the Web sites of PLoS Medicine at <http://www.plosmedicine.org/>, Annals of Internal Medicine at <http://www.annals.org/>, and Epidemiology at <http://www.epidem.com/>). Information on the STROBE Initiative is available at <http://www.strobe-statement.org>.

# BMJ Open

## The influence of work ability and smoking on the prognosis of long-duration activity-limiting neck/back pain – a cohort study of a Swedish working population

|                                 |                                                                                                                                                                                                                                                                                                                                                                                                                                                                                                                                                                                             |
|---------------------------------|---------------------------------------------------------------------------------------------------------------------------------------------------------------------------------------------------------------------------------------------------------------------------------------------------------------------------------------------------------------------------------------------------------------------------------------------------------------------------------------------------------------------------------------------------------------------------------------------|
| Journal:                        | <i>BMJ Open</i>                                                                                                                                                                                                                                                                                                                                                                                                                                                                                                                                                                             |
| Manuscript ID                   | bmjopen-2021-054512.R1                                                                                                                                                                                                                                                                                                                                                                                                                                                                                                                                                                      |
| Article Type:                   | Original research                                                                                                                                                                                                                                                                                                                                                                                                                                                                                                                                                                           |
| Date Submitted by the Author:   | 13-Jan-2022                                                                                                                                                                                                                                                                                                                                                                                                                                                                                                                                                                                 |
| Complete List of Authors:       | Bohman, Tony; Karolinska Institutet, Institute of Environmental Medicine; Dalarna University School of Education Health and Social Studies<br>Holm, Lena; Karolinska Institutet, Institute of Environmental Medicine<br>Lekander, Mats; Stockholm University, Stress Research Institute; Karolinska Institutet, Department of Clinical Neuroscience<br>Hallqvist, Johan; Uppsala University, Department of Public Health and Caring Sciences<br>Skillgate, Eva; Karolinska Institutet, Institute of Environmental Medicine; Sophiahemmet University, Department of health promotion science |
| <b>Primary Subject Heading</b>: | Epidemiology                                                                                                                                                                                                                                                                                                                                                                                                                                                                                                                                                                                |
| Secondary Subject Heading:      | Public health                                                                                                                                                                                                                                                                                                                                                                                                                                                                                                                                                                               |
| Keywords:                       | Musculoskeletal disorders < ORTHOPAEDIC & TRAUMA SURGERY, PUBLIC HEALTH, EPIDEMIOLOGY, Back pain < ORTHOPAEDIC & TRAUMA SURGERY, Spine < ORTHOPAEDIC & TRAUMA SURGERY                                                                                                                                                                                                                                                                                                                                                                                                                       |
|                                 |                                                                                                                                                                                                                                                                                                                                                                                                                                                                                                                                                                                             |

SCHOLARONE™  
Manuscripts



I, the Submitting Author has the right to grant and does grant on behalf of all authors of the Work (as defined in the below author licence), an exclusive licence and/or a non-exclusive licence for contributions from authors who are: i) UK Crown employees; ii) where BMJ has agreed a CC-BY licence shall apply, and/or iii) in accordance with the terms applicable for US Federal Government officers or employees acting as part of their official duties; on a worldwide, perpetual, irrevocable, royalty-free basis to BMJ Publishing Group Ltd ("BMJ") its licensees and where the relevant Journal is co-owned by BMJ to the co-owners of the Journal, to publish the Work in this journal and any other BMJ products and to exploit all rights, as set out in our [licence](#).

The Submitting Author accepts and understands that any supply made under these terms is made by BMJ to the Submitting Author unless you are acting as an employee on behalf of your employer or a postgraduate student of an affiliated institution which is paying any applicable article publishing charge ("APC") for Open Access articles. Where the Submitting Author wishes to make the Work available on an Open Access basis (and intends to pay the relevant APC), the terms of reuse of such Open Access shall be governed by a Creative Commons licence – details of these licences and which [Creative Commons](#) licence will apply to this Work are set out in our licence referred to above.

Other than as permitted in any relevant BMJ Author's Self Archiving Policies, I confirm this Work has not been accepted for publication elsewhere, is not being considered for publication elsewhere and does not duplicate material already published. I confirm all authors consent to publication of this Work and authorise the granting of this licence.

1  
2  
3  
4 The influence of work ability and smoking on the prognosis of long-  
5  
6  
7 duration activity-limiting neck/back pain – a cohort study of a  
8  
9  
10 Swedish working population  
11  
12

13 Tony Bohman<sup>1,2\*</sup>, Lena W Holm<sup>1</sup>, Mats Lekander<sup>3,4</sup>, Johan Hallqvist<sup>5</sup>, Eva Skillgate<sup>1,6</sup>  
14  
15  
16

17  
18 <sup>1</sup>Institute of Environmental Medicine, Unit of Intervention and Implementation Research for  
19  
20 Worker Health, Karolinska Institutet, Stockholm, Sweden  
21

22  
23 <sup>2</sup>School of Education, Health and Social Studies, Dalarna University, Sweden  
24

25  
26 <sup>3</sup>Stress Research Institute, Stockholm University, Sweden  
27

28  
29 <sup>4</sup>Department of Clinical Neuroscience, Karolinska Institutet, Stockholm, Sweden  
30

31  
32 <sup>5</sup>Department of Public Health and Caring Sciences, Family Medicine and Preventive  
33  
34 Medicine, Uppsala University, Uppsala, Sweden  
35

36  
37 <sup>6</sup>Department of Health Promotion Science, Musculoskeletal & Sports Injury Epidemiology  
38  
39 Center, Sophiahemmet University, Stockholm, Sweden  
40

41  
42 \*Corresponding author:

43  
44 Tony Bohman

45  
46 Institute of Environmental Medicine, Unit of Intervention and Implementation Research for  
47  
48 Worker Health, Karolinska Institutet, Box 210, SE-171 77 Stockholm, Sweden  
49

50  
51 E-mail: [tony.bohman@ki.se](mailto:tony.bohman@ki.se)

52  
53 Cell phone: +46 70 299 62 63  
54  
55  
56  
57  
58  
59  
60



## Abstract

### Objectives

Long-duration activity-limiting neck/back pain is common, but the knowledge of what work and lifestyle factors that influence the prognosis is sparse. The objective was therefore to here evaluate if two factors, good self-perceived work ability and no daily smoking, are associated with a favourable prognosis of long-duration activity-limiting neck/back pain in a working population, and if these exposures have a synergistic prognostic effect.

### Design

A prospective cohort study based on three subsamples from the Stockholm Public Health Cohort.

### Settings

A working population in Stockholm County, Sweden.

### Participants

Individuals, 18-61 years old, reporting long-duration activity-limiting neck/back pain the previous six months at baseline in 2010 (n=5,177).

### Measures

The exposures were: self-perceived work ability (categorised into good, moderate, and poor), and daily smoking (no/yes). The outcome in 2014 was “absence of long-duration activity-limiting neck/back pain” the previous six months representing a favourable prognosis of reported problems at baseline in 2010. Risk ratios (RRs) and risk differences (RDs) with 95% CI was estimated by general linear regressions, and the synergistic effect by the synergy index (SI) with 95% CI.

## Results

Participants with moderate or good work ability, respectively, had an adjusted RR for a favourable prognosis of 1.37 (95% CI: 1.11-1.69), and 1.80 (1.49-2.17) in comparison to participants with poor work ability. The corresponding adjusted RD were 0.07 (0.02-0.11) and 0.17 (0.12-0.22). Participants not smoking on daily basis had an adjusted RR of 1.21 (1.02-1.42), and an adjusted RD of 0.05 (0.01-0.10) for a favourable outcome compared to daily smokers. The adjusted SI was 0.92 (0.60-1.43).

## Conclusion

For participants with long-duration activity-limiting neck/back pain, moderate or good self-perceived work ability and not being a daily smoker were associated with a favourable prognosis but having both exposures seemed to have no synergistic prognostic effect.

Keywords: disability evaluation, musculoskeletal pain, public health, tobacco use

## Strengths and limitations of this study

- The longitudinal design ensures temporality and the large number of potential confounders considered increase the possibility of a causal association between the exposers and the outcome.
- The large sample size and robust analyses strengthens the internal validity.
- The main limitations of this study are possible misclassification of the exposures and the outcome, a relatively large loss to follow-up and a possible change of exposure category during the follow-up period of four years, although these limitations most probably lead to an underestimation of the associations studied.

- 1  
2  
3  
4  
5  
6  
7  
8  
9  
10  
11  
12  
13  
14  
15  
16  
17  
18  
19  
20  
21  
22  
23  
24  
25  
26  
27  
28  
29  
30  
31  
32  
33  
34  
35  
36  
37  
38  
39  
40  
41  
42  
43  
44  
45  
46  
47  
48  
49  
50  
51  
52  
53  
54  
55  
56  
57  
58  
59  
60
- There is a possible risk that reversed causation have influenced the analyses with perceived work ability as exposure, but the additional analyses indicates that this risk is small.

For peer review only

## Introduction

According to the Global Burden of Disease study, neck pain and back pain are among the top causes for “years lived with disability”, with a high and rising prevalence globally (1). Most neck and back problems resolve, but many individuals experience pain for a long time following onset (2, 3). Between 17% to 70% of individuals with neck pain report activity-limiting pain (3). Long-duration activity-limiting neck/back pain (LANBP) is most prevalent in working age, and often decrease work performance (2, 4). From a public health perspective, LANBP adds to the societal and individual burden as it is a common cause for absenteeism and early retirement (5). Still, and in accordance with current recommendations, many individuals with musculoskeletal pain go to work (4).

One way to address this burden of LANBP is to increase the understanding of modifiable lifestyle and work-related factors associated to a favourable prognosis and their potential interactions. Research about prognosis of LANBP have so far focused on factors of potential importance for the transition from acute/sub-acute neck and back pain to LANBP, and several biopsychosocial factors are suggested to be associated to such an unfavourable prognosis. Examples of such factors are smoking, low physical activity, depression, anxiety, and low work satisfaction (2, 6). On the other hand, only greater optimism, good social support, positive coping and exercise/sport activities are proposed as factors associated to a favourable prognosis for long-duration and activity-limiting neck pain, and none for back pain (6). Thus, knowledge of if work-related factors and lifestyle factors, other than physical activities, associate to a favourable prognosis of LANBP is lacking.

The multidimensional work ability model was introduced in Finland in the 1980s in order to study self-perceived work ability in relation to work-disability and health (7, 8). According to the model, self-perceived work ability is based on health and functional capacity and built on a balance between a person’s resources such as competence, values, attitudes, motivation, and

1  
2  
3 work demands. Self-perceived work ability is commonly assessed by the Work Ability Index  
4 (WAI) or by single items of the instrument (9). Work ability is associated with health and  
5 health related outcomes, eg depression, osteoarthritis, neck and back pain, sickness absence  
6 and general health (7, 10). Furthermore, the total WAI or single WAI items seems to be  
7 valuable for predicting sickness absence in healthy as well in unhealthy populations, with  
8 good work ability being a protective factor in all diseases studied (10-14). However, work  
9 ability in relation to the prognosis of neck/back pain is rarely studied. Nordstoga et al.,  
10 studying back pain patients referred to physiotherapy, found no association between baseline  
11 work ability and disability or pain three months later (15). Ahlström et al., followed Swedish  
12 female workers on long-term sick leave for 12 months, the majority with neck pain, and found  
13 work ability to predict the future degree of neck pain (10). In a recent study from our group,  
14 we found that poor work ability, assessed with the second WAI item (perceived mental and/or  
15 physical work ability), increased the risk of LANBP in workers with occasional neck- and/or  
16 back pain (16).

17  
18  
19  
20  
21  
22  
23  
24  
25  
26  
27  
28  
29  
30  
31  
32  
33  
34  
35  
36  
37  
38  
39  
40  
41  
42  
43  
44  
45  
46  
47  
48  
49  
50  
51  
52  
53  
54  
55  
56  
57  
58  
59  
60

So far, we know that smoking is associated with the onset of neck and back pain, and with the transition from acute/subacute to long-duration back pain, but we do not know if being a non-smoker is associated with a favourable prognosis of LANBP (2, 6). If so, and considering a known association between smoking and poor work ability, examine their potential interaction on the prognosis of LANBP would enhance our understanding and meet the demand for studies examining such interactions from reviews on the prognosis of neck and back pain (17, 18, 19).

Therefore, the objective of this study was to evaluate if good self-perceived work ability and no daily smoking are associated with a favourable prognosis of LANBP in a working population, and if these exposures have a synergistic prognostic effect.

## Methods

### Design and study population

In this prospective cohort study, we used merged data from three subcohorts of the Stockholm Public Health Cohort (SPHC) (20). The SPHC consists of several public health surveys of individuals randomly selected from the adult population of Stockholm County. The first subcohort included individuals selected in 2002 and followed up in 2007, 2010 and 2014. The second cohort included individuals selected in 2006 and followed up in 2010 and 2014, and the third subcohort individuals selected in 2010 and followed up in 2014. Approximately 74,000 individuals from the subcohorts responded to the questionnaire in 2010, which was used as baseline in the present study. Of these, approximately 50,000 individuals (68%) responded to the questionnaire in 2014, used as the follow-up survey in the present study. Of the responders in 2010, 39,704 were 18-61 years of age and were working since at least 12 months, representing our “working population”. We chose the age limit of 61 in 2010 to ensure that most of our population would still be working in 2014 as 65 was the norm for retirement age in Sweden at the time of the data collection. Figure 1 describes the inclusion of participants into the study population and the analyses sample.

Neck and back pain at baseline in 2010 were assessed with the questions; “Have you had any pain in your upper back or neck in the preceding 6 months?”, and “Have you had any pain in your lower back in the preceding 6 months?”. Both questions were followed by the question; “If yes: Do these problems limit your ability to work or carry out other daily activities?”.

Individuals answering, “Yes, on average, a few days per week or more” to at least one of the first two questions and then “Yes, to a high degree *or* to some degree” to the following question were considered as having LANBP. The questions defining LANBP incorporates

1  
2  
3 duration, frequency and the impact on daily activity and work which is recommended when  
4  
5 classifying neck and back pain (18, 21).  
6

7 Ethical approval was received from the regional ethical board in Stockholm (Dnr; 2007/545-  
8  
9 31, 2013/497-32 and 2015/1204-32).  
10  
11

## 12 13 Exposures

14  
15 The exposure “self-perceived work ability” (PWA) was categorised based on the second item  
16  
17 of the WAI (7, 9, 22). The item consists of two questions, one regarding physical demands  
18  
19 and one regarding mental demands at work, respectively: “How do you rate your current work  
20  
21 ability with respect to the *physical demands/mental demands* of your work”. The response  
22  
23 alternatives were “Very good”, “Rather good”, “Moderate”, “Rather poor” and “Very poor”.  
24  
25

26  
27 The answers were dichotomized into good (very good or rather good) and poor (moderate,  
28  
29 rather poor or very poor) physical and mental work ability, respectively. Finally, PWA was  
30  
31 operationalised into three categories: good PWA (good physical *and* good mental work  
32  
33 ability), moderate PWA (good physical *or* good mental work ability, but not both) and poor  
34  
35 PWA (poor physical *and* poor mental work ability).  
36  
37

38  
39 The WAI is considered an internally coherent, reliable, and valid instrument appropriate for  
40  
41 use in cross-national research (9, 23, 24). Most often, the full WAI is used in research, but  
42  
43 also single items have been utilised as measures, for example the second WAI item used to  
44  
45 operationalise the exposure in the present study (10-12, 25).  
46  
47

48 The exposure “daily smoking” (DS) was dichotomized by the answer yes or no to the  
49  
50 question: “Do you currently smoke daily or almost daily?”.  
51  
52

## 53 54 Outcome

55  
56 The outcome “absence of long-duration activity-limiting neck/back pain” in 2014 represents a  
57  
58 favourable prognosis of reported problems at baseline in 2010. The definition was based on  
59  
60

1  
2  
3 the same questions used defining the study population. Participants defined as having a  
4 favourable prognosis (cases) were those reporting no neck/back pain *or* neck/back pain not  
5 limiting their activity in daily life or at work the preceding six months. Consequently, non-  
6 limiting their activity in daily life or at work the preceding six months. Consequently, non-  
7 cases have had pain of any duration and frequency in the neck and/or back that limited  
8 activity in daily life or at work to some or to a high degree during the preceding six months.  
9  
10  
11  
12  
13  
14

## 15 Potential confounders

16  
17  
18 Potential confounders for the association between the exposure and the outcome were chosen  
19 based on literature, theoretical and clinical considerations, and availability in the  
20 questionnaire (2, 3, 6, 26). Potential confounders are presented in the Appendix. Most of the  
21 items used to measure the potential confounders have regularly been used in Swedish public  
22 health surveys since 1975, and since 2002 in the SPHC (20).  
23  
24  
25  
26  
27  
28  
29

## 30 Statistics

31  
32  
33 Stata version 14.2 (StataCorp College Station, TX, USA) were used for statistical analyses.  
34  
35 The association between the exposures and the outcome were estimated using general linear  
36 models with a binomial distribution and a log-link and reported as risk ratio (RR) and risk  
37 difference (RD) with corresponding 95% confidence intervals (CI). The exposures, PWA and  
38 DS were assessed in separate general linear models. Potential confounders were identified by  
39 reviewing the literature of prognostic factors, clinical considerations, and availability. After  
40 careful discussion about if they instead possibly could be intermediators or colliders, the  
41 potential confounders were introduced into the crude models one by one. Potential  
42 confounders changing the estimated RR by 5% or more were considered confounders and  
43 were included in the final adjusted models (27). DS was tested as a confounder in the analyses  
44 with PWA as exposure and PWA was tested as a confounder in the analyses with DS as  
45 exposure. A variable indicating subsample participation was included in all models to adjust  
46  
47  
48  
49  
50  
51  
52  
53  
54  
55  
56  
57  
58  
59  
60



1  
2  
3 for potential systematic difference between the subcohorts. The general linear models were  
4 performed using complete-subject analyses. The Chi-square test was used to test a potential  
5 dose-response effect (28).  
6  
7

8  
9  
10 To calculate the potential synergistic effect of PWA and DS on the outcome, we used the  
11 EpiNET's epidemiological tool (29). We dichotomised PWA into good PWA and  
12 moderate/poor PWA and then combined the dichotomized PWA and DS in a dummy variable,  
13 where the reference group was set to those having moderate/poor PWA and being daily  
14 smokers. The dummy variable was then used as the independent factor in a crude and an  
15 adjusted logistic regression. The results were presented as RR with corresponding 95% CI  
16 together with the synergy index (SI) with corresponding 95% CI. A SI >1 indicates a joint  
17 effect between two factors greater than the sum of their individual effects.  
18  
19  
20  
21  
22  
23  
24  
25  
26  
27  
28

### 29 Additional analyses

30  
31  
32 We had no information on the intensity of LANBP at baseline, which may be an important  
33 confounder in the analyses. As poor self-related health may be a consequence of severe pain  
34 intensity, we performed the adjusted analyses with PWA as exposure stratified by good (very  
35 good/good) and poor (fair/poor/very poor) self-rated health (SRH), as a proxy for the intensity  
36 of neck/back pain at baseline (30).  
37  
38  
39  
40  
41  
42

43 The potential influence of attrition was assessed by comparing the prevalence of the two  
44 exposures among non-responders (n=1,865) to the prevalence among responders (n=3,312)  
45 using Chi-square tests.  
46  
47  
48  
49

### 50 Patient and Public Involvement

51  
52 Patients or the public were not involved in the design or planning of the study.  
53  
54  
55  
56  
57  
58  
59  
60

## Results

Baseline characteristics of the study population are presented in Table 1. The mean age was 46 years (SD 10) and 66% were women. Eighty percent reported good or moderate self-perceived work ability and 84% were not smoking daily. Most participants were non-manual workers or self-employed (65%), and the majority lived together with another adult person, with or without children (77%). At follow-up in 2014, 36% of the participants showed a favourable prognosis of LANBP.

**Table 1** Baseline characteristics by the exposures perceived work ability (PWA) and daily smoking (DS). Study population, n=5,177.

| Baseline characteristics, n (%)                            | Perceived work ability<br>(n=5,177) |            |            | Daily smoking<br>(n=5,138) |          | Int. Missing  |
|------------------------------------------------------------|-------------------------------------|------------|------------|----------------------------|----------|---------------|
|                                                            | Good                                | Moderate   | Poor       | No                         | Yes      | PWA/DS<br>n/n |
| <b>Sex:</b> Women                                          | 3,076 (59)                          | 1,080 (21) | 1,021 (20) | 4,320 (84)                 | 818 (16) | 0/0           |
| <b>Average age,</b> years (SD)                             | 45 (10)                             | 46 (10)    | 47 (10)    | 45 (10)                    | 47 (10)  | 0/0           |
| <b>Perceived work ability:</b> Good                        |                                     |            |            | 2,679 (62)                 | 377 (46) | -/0           |
| Moderate                                                   |                                     |            |            | 888 (21)                   | 186 (23) |               |
| Poor                                                       |                                     |            |            | 753 (17)                   | 255 (31) |               |
| <b>Daily smoking:</b> Yes                                  | 377 (12)                            | 186 (17)   | 255 (25)   |                            |          | 39/-          |
| <b>BMI:</b> Underweight/Normal weight                      | 1,550 (51)                          | 530 (51)   | 408 (41)   | 2,093 (49)                 | 383 (48) | 128/127       |
| Overweight/Obese                                           | 1,457 (49)                          | 522 (49)   | 582 (59)   | 2,122 (51)                 | 413 (52) |               |
| <b>SES:</b> Unskilled/semiskilled worker                   | 435 (15)                            | 219 (22)   | 301 (32)   | 712 (17)                   | 236 (30) | 267/263       |
| Skilled worker                                             | 393 (13)                            | 173 (17)   | 183 (20)   | 566 (14)                   | 174 (22) |               |
| Low level non-manual employees                             | 465 (16)                            | 137 (13)   | 120 (13)   | 603 (15)                   | 115 (15) |               |
| Middle level non-manual employees                          | 806 (27)                            | 255 (25)   | 180 (19)   | 1,111 (27)                 | 124 (16) |               |
| High level non-manual employees/self-employed              | 849 (29)                            | 238 (23)   | 156 (16)   | 1,103 (27)                 | 131 (17) |               |
| <b>Household:</b> Living with adult, with/without children | 2,463 (81)                          | 791 (74)   | 685 (68)   | 3,361 (78)                 | 555 (68) | 40/36         |
| Living alone/Living with children only                     | 601 (19)                            | 277 (26)   | 320 (42)   | 928 (22)                   | 258 (32) |               |
| <b>Headache/migraine:</b> Yes                              | 1,330 (44)                          | 556 (53)   | 631 (66)   | 2,084 (50)                 | 416 (53) | 160/152       |

|                                                                   |            |          |          |            |          |         |
|-------------------------------------------------------------------|------------|----------|----------|------------|----------|---------|
| <b>Psychological distress: No</b>                                 | 2,403 (78) | 596 (56) | 382 (38) | 2,876 (67) | 479 (59) | 25/24   |
| Mild/Severe                                                       | 456 (15)   | 259 (24) | 263 (26) | 801 (19)   | 169 (21) |         |
| Severe                                                            | 207 (7)    | 217 (20) | 369 (36) | 622 (14)   | 167 (20) |         |
| <b>Personal support: No</b>                                       | 359 (12)   | 219 (20) | 307 (30) | 698 (16)   | 182 (22) | 32/28   |
| <b>Sleep disturbances: Yes</b>                                    | 1,254 (42) | 623 (59) | 744 (76) | 2,120 (50) | 480 (61) | 150/144 |
| <b>Sedentary leisure time: &lt;2 hours/day</b>                    | 1,802 (59) | 540 (50) | 502 (50) | 2,441 (57) | 385 (48) | 35/33   |
| >2 hours/day                                                      | 1,253 (41) | 536 (50) | 509 (50) | 1,854 (43) | 425 (52) |         |
| <b>Leisure physical activity, mod intensity: &lt;20 min/day</b>   | 977 (32)   | 389 (36) | 436 (43) | 1,435 (34) | 352 (44) | 52/49   |
| >20 min/day                                                       | 2,073 (68) | 683 (64) | 567 (57) | 2,851 (66) | 456 (56) |         |
| <b>Leisure physical activity, high intensity: &lt;1 hour/week</b> | 1,301 (43) | 532 (50) | 562 (56) | 1,883 (44) | 495 (61) | 45/43   |
| >1 hour/week                                                      | 1,753 (57) | 540 (50) | 444 (44) | 2,404 (56) | 313 (39) |         |
| <b>Physical workload: Sedentary at least 50%</b>                  | 1,801 (60) | 537 (51) | 448 (46) | 2,410 (57) | 361 (46) | 117/114 |
| Standing/walking/some lifting                                     | 727 (24)   | 291 (27) | 319 (33) | 1,094 (26) | 230 (29) |         |
| Walking/lifting/heavy work                                        | 496 (16)   | 232 (22) | 209 (21) | 738 (17)   | 191 (25) |         |
| <b>Subsample participation: 2002/2007/2010/2014</b>               | 781 (25)   | 269 (25) | 233 (23) | 1,106 (26) | 170 (21) | 0/0     |
| 2006/2010/2014                                                    | 1,011 (33) | 352 (33) | 346 (34) | 1,432 (33) | 268 (33) |         |
| 2010/2014                                                         | 1,284 (42) | 459 (42) | 442 (43) | 1,782 (41) | 380 (46) |         |
| <b>Self-rated health: Very good</b>                               | 293 (9)    | 23 (2)   | 12 (1)   | 302 (7)    | 26 (3)   | 49/48   |
| Good                                                              | 1,801 (59) | 336 (32) | 145 (14) | 1,982 (46) | 286 (35) |         |
| Fair                                                              | 877 (29)   | 567 (53) | 536 (53) | 1,585 (37) | 376 (46) |         |
| Poor or very poor                                                 | 82 (3)     | 137 (13) | 319 (32) | 408 (10)   | 125 (16) |         |

**Note:** For a description of the variables and their categorisation see the Appendix. **Abbreviation:** SES; Socioeconomic status.

1  
2  
3 The crude and adjusted associations between self-perceived work ability, daily smoking and a  
4 favourable prognosis of LANBP are presented in Table 2. Socioeconomic status,  
5  
6 headache/migraine and sleep disturbances were identified as confounders in the analyses with  
7  
8 self-perceived work ability as exposure, while socioeconomic status, sleep disturbances and  
9  
10 self-perceived work ability confounded the association between daily smoking and the  
11  
12  
13  
14  
15 outcome.  
16  
17  
18  
19  
20  
21  
22  
23  
24  
25  
26  
27  
28  
29  
30  
31  
32  
33  
34  
35  
36  
37  
38  
39  
40  
41  
42  
43  
44  
45  
46  
47  
48  
49  
50  
51  
52  
53  
54  
55  
56  
57  
58  
59  
60

For peer review only

**Table 2** Associations\* between the exposures perceived work ability (PWA) and daily smoking (DS) in 2010, and a favourable prognosis of long-duration activity-limiting neck and/or back pain in 2014.

| Exposure                      | Cases/total | Crude (n=3,312) |           | Adjusted <sup>a</sup> (n=3,049) |           | Adjusted <sup>a</sup> |           |
|-------------------------------|-------------|-----------------|-----------|---------------------------------|-----------|-----------------------|-----------|
|                               |             | RR              | 95% CI    | RR                              | 95% CI    | RD                    | 95% CI    |
| <b>Perceived work ability</b> |             |                 |           |                                 |           |                       |           |
| Poor                          | 115/596     | 1               |           | 1                               |           | 0                     |           |
| Moderate                      | 203/688     | 1.53            | 1.25-1.87 | 1.37                            | 1.11-1.69 | 0.07                  | 0.02-0.11 |
| Good                          | 873/2,028   | 2.23            | 1.88-2.65 | 1.80                            | 1.49-2.17 | 0.17                  | 0.12-0.22 |
| Exposure                      | Cases/total | Crude (n=3,292) |           | Adjusted <sup>b</sup> (n=3,088) |           | Adjusted <sup>b</sup> |           |
|                               |             | RR              | 95% CI    | RR                              | 95% CI    | RD                    | 95% CI    |
| <b>Daily smoking</b>          |             |                 |           |                                 |           |                       |           |
| Yes                           | 115/459     | 1               |           | 1                               |           | 0                     |           |
| No                            | 1,070/2,833 | 1.51            | 1.28-1.78 | 1.21                            | 1.02-1.42 | 0.05                  | 0.01-0.10 |

\*General linear models with a binomial distribution and a log-link, estimating the risk ratio (RR), or an identity-link, estimating the risk difference (RD), with corresponding 95% confidence intervals (CI). <sup>a</sup>Adjusted for socioeconomic status, headache/migraine, sleep disturbances and subsample participation; <sup>b</sup>Adjusted for socioeconomic status, sleep disturbances, perceived work ability and subsample participation.

1  
2  
3 In comparison to participants with poor work ability participants with moderate or good work  
4 ability, had an adjusted RR for a favourable prognosis of 1.37 (95% CI: 1.11-1.69), and 1.80  
5  
6 (1.49-2.17), respectively. The corresponding adjusted RD were 0.07 (0.02-0.11) and 0.17  
7  
8 (0.12-0.22). Participants not smoking on daily basis had an adjusted RR of 1.21 (1.02-1.42),  
9  
10 and an adjusted RD of 0.05 (0.01-0.10) for a favourable outcome compared to daily smokers.

11  
12  
13  
14 The analyses with self-perceived work ability as exposure showed a significant dose-response  
15  
16 towards a more favourable prognosis with higher work ability ( $p < 0.001$ ).

17  
18  
19 Table 3 shows the result of the evaluation of the synergistic associations between the  
20  
21 exposures and the outcome, resulting in an adjusted SI of 0.92 (95% CI: 0.60-1.43).  
22  
23  
24  
25  
26  
27  
28  
29  
30  
31  
32  
33  
34  
35  
36  
37  
38  
39  
40  
41  
42  
43  
44  
45  
46  
47  
48  
49  
50  
51  
52  
53  
54  
55  
56  
57  
58  
59  
60

**Table 3** Analyses\* of the potential synergistic effects of the two exposures perceived work ability (PWA) and daily smoking (DS), on a favourable prognosis of long-duration activity-limiting neck and/or back pain.

| Exposure                                                  | Cases/total | Crude (n=3,312) |           | Adjusted <sup>a</sup> (n=3,049) |           |
|-----------------------------------------------------------|-------------|-----------------|-----------|---------------------------------|-----------|
|                                                           |             | RR              | 95% CI    | RR                              | 95% CI    |
| Moderate/poor perceived work ability and daily smoking    | 39/253      | 1               |           | 1                               |           |
| Moderate/poor perceived work ability and no daily smoking | 276/1,022   | 1.88            | 1.32-2.66 | 1.61                            | 1.11-2.34 |
| Good perceived work ability and daily smoking             | 76/206      | 2.96            | 1.93-4.54 | 2.33                            | 1.49-3.66 |
| Good perceived work ability and no daily smoking          | 794/1,811   | 3.96            | 2.84-5.52 | 2.80                            | 1.95-4.02 |
| <b>Synergy index</b>                                      |             |                 |           | 0.92                            | 0.60-1.43 |

\*Using EpiNET's epidemiological tool "Epinetcalculation.xlsx" based on the results from logistic regressions. <sup>a</sup>Adjusted for socioeconomic status, headache/migraine, sleep disturbances and subsample participation. **Abbreviations:** RR; risk ratio, CI; confidence interval.



## Additional results

Stratifying the analyses of the exposure self-perceived work ability by good and poor self-rated health, as a proxy for the intensity of neck/back pain at baseline, resulted in similar adjusted RR for the two strata. The RR for a favourable prognosis of LANBP when reporting moderate work ability showed a similar increase for participants with poor self-rated health and participants with good self-rated health, 1.42 (95% CI; 0.93-2.15) and 1.27 (95% CI; 0.98-1.63), compared with participants with poor work ability. The RR were also similar for those reporting good work ability in both strata, 1.72 (95% CI; 1.17-2.53) and 1.56 (95% CI; 1.23-1.96), respectively.

At baseline in 2010, non-responders had a significantly higher prevalence ( $p < 0.001$ ) of individuals with poor self-perceived work ability and daily smokers (23% and 19%) in comparison with responders (18% and 14%).

## Discussion

In this study we found an association between self-perceived work ability and a favourable prognosis of long-duration activity-limiting neck/back pain four years later. The results revealed that individuals in a working population with moderate self-perceived work ability (either good physical or good mental work ability) had a 37% increased chance of a favourable prognosis of long-duration activity-limiting neck/back pain, compared to individuals with poor self-perceived work ability (poor physical and poor mental work ability). The chance of a favourable prognosis was even higher (80%) for individuals reporting good self-perceived work ability (both good physical and good mental work ability). In addition, the results showed that individuals that did not smoke daily had a 21% higher chance of a favourable prognosis than did daily smokers.

1  
2  
3 A possible synergetic effect on a favourable prognosis for participants reporting good work  
4 ability and not smoke on daily basis could not be confirmed.

5  
6  
7 Previously, Nordstoga et al. found no association between baseline work ability and  
8 improvement of back pain or disability in physiotherapy patients with back pain of any  
9 duration, which contrasts with our results (15). Their study included patients with back pain  
10 of any duration, had a follow-up time of only three months, and they used the question  
11 “describe your current work ability compared with the lifetime best (0-10)” as a measure of  
12 self-perceived work ability. More in line with our result, Ahlström et al. found higher baseline  
13 work ability, defined by the same question as Nordstoga et al. and by the full WAI, to predict  
14 lower degree of neck pain at six and 12 months among women on long-term sick-leave (10).  
15 We have not found any previous study of association between smoking and a favourable  
16 prognosis, either for neck or for back pain, or on the synergetic effect of work ability and  
17 smoking.

18  
19 The mechanism for smoking to affect spinal pain is not yet well understood, but increased  
20 levels of pro-inflammatory cytokines, changed pain perception, impaired blood supply, and  
21 impaired oxygen delivery to tissues caused by increased sympathetic outflow has been  
22 suggested (31, 32). The latter could be one possible underlying mechanism to the higher  
23 prevalence of osteoporosis and lumbar disc disease found in smokers compared to non-  
24 smokers (31, 32). As the concept of self-perceived work ability incorporate individual factors,  
25 work-related factors and environmental factors, a specific mechanism for good self-perceived  
26 work ability to associate with a favourable prognosis of LANBP may be difficult to delineate  
27 (7).

28  
29 The present study has some possible limitations. Clustering individuals with neck and back  
30 pain when studying prognostic factors may be questioned, since prognostic factors for neck-  
31 and back pain may differ. But, as a priory analysis evaluating participants with long-duration  
32  
33  
34  
35  
36  
37  
38  
39  
40  
41  
42  
43  
44  
45  
46  
47  
48  
49  
50  
51  
52  
53  
54  
55  
56  
57  
58  
59  
60

1  
2  
3 activity-limiting neck and back pain separately, resulted in almost identical crude estimates,  
4  
5 we decided to merge the data to increase the statistical power.  
6

7  
8 Even though a large number of potential confounders was considered unmeasured  
9  
10 confounding could not be ruled out. There is also a risk of residual confounding due to  
11  
12 unprecise measure of confounding factors, i.e. socioeconomic status. Such bias may have led  
13  
14 to underestimation or overestimation of the results. We had no baseline information on pain  
15  
16 intensity prior to inclusion into the cohort, therefore we could not consider pain intensity as a  
17  
18 potential confounder. If pain intensity at baseline is associated with the reported levels of  
19  
20 PWA at baseline, bias due to reversed causation may be present (27). Then our results may  
21  
22 have been overestimated.  
23  
24

25  
26 However, we believe that the risk of reversed causation due to baseline pain intensity is  
27  
28 limited as individual self-perceived work ability is most likely a combination of many factors  
29  
30 other than pain, for example content, demands and organisation of work, personal attitudes,  
31  
32 motivation, knowledge and skills, and functional capacity (8). Furthermore, given that pain is  
33  
34 related to health, the additional analyses stratified by good and poor self-rated health  
35  
36 indicating that good PWA is beneficial no matter the degree of self-rated health also supports  
37  
38 a low risk of bias due to reversed causation.  
39  
40

41  
42 Misclassification of the exposures and outcome needs consideration. Problems to recall and to  
43  
44 appraise whether the pain during the preceding six months was activity-limiting or not may  
45  
46 have resulted in non-cases being classified as cases and vice versa. This possible  
47  
48 misclassification of the outcome is most probably non-differential potentially leading to a  
49  
50 dilution of our associations (27). The exposure PWA was assessed with only one subscale of  
51  
52 the WAI. Nonetheless, this subscale from the WAI is found to be internally coherent to the  
53  
54 full WAI (25). Furthermore, the operationalisation of the exposure PWA by dichotomising a  
55  
56 five category scales of mental and physical work ability and then combining them may have  
57  
58  
59  
60

1  
2  
3 led to bias due to misclassification. Smoking was measured with a yes/no question about daily  
4 smoking, which is a rough measure of such exposure. By categorising former smokers as non-  
5 smokers and smokers who only smoke a few cigarettes a day as smokers, we might have  
6 introduced a misclassification of this exposure. These potential misclassifications of the  
7 exposures most likely is non-differential, thus potentially diluting the associations.  
8  
9

10  
11  
12  
13  
14 As the follow-up period was four years work ability and smoking status may have varied  
15 across this period, and participants may have changed jobs or work assignments. If so, this  
16 would probably dilute the estimation of the association.  
17  
18

19  
20  
21 With a response rate of 64% between baseline and follow-up there is a risk of selection bias.  
22  
23 Non-responders had a significantly higher proportion of smokers and individuals with poor  
24 self-perceived work ability than did responders. If most of these individuals would experience  
25 a favourable prognosis of their long-duration activity-limiting neck/back pain, a scenario we  
26 find unlikely, our results may be overestimated.  
27  
28

29  
30  
31  
32  
33 Strengths of this study are the longitudinal design, and a relatively large sample size, allowing  
34 evaluation of the outcome along categories of the exposure. However, despite a large sample,  
35 the evaluation of synergetic effects may have been hampered by few cases in the reference  
36 categories. The dose-response results found supports a causal association between self-  
37 perceived work ability and long-duration activity-limiting neck/back pain, and the extensive  
38 confounder control supports internal validity. We also regard the incorporation of activity  
39 limitations in the definition of the baseline pain and in the outcome as a strength. Activity  
40 limitations is recommended to be included in measures for neck and back pain, recognised to  
41 be of clinical importance, and to have negative consequences for the affected individual and  
42 for the society (1, 5, 18, 21).  
43  
44  
45  
46  
47  
48  
49  
50  
51  
52  
53

54  
55  
56 To our knowledge this is the first study assessing self-perceived work ability and smoking  
57 focusing on a favourable prognosis of long-duration activity-limiting neck/back pain. Even  
58  
59  
60

1  
2  
3 though more research is needed to confirm our findings, they imply that good work ability  
4 and not smoking daily appears to predict a favourable prognosis of long-duration activity-  
5 limiting neck/back pain. Thus, interventions to improve physical and mental work ability and  
6  
7  
8 limiting neck/back pain. Thus, interventions to improve physical and mental work ability and  
9  
10 reduce smoking may enhance the chance for a favourable prognosis in workers with long-  
11  
12 duration activity-limiting neck/back pain. Therefore, further research focusing on such  
13  
14 interventions is motivated. Such interventions could be directed towards both the workplace  
15  
16 organisation and the individual, possibly resulting in reduced human suffering and societal  
17  
18 costs.  
19  
20  
21

## 22 Conclusion

23  
24  
25 Having a good physical and/or mental self-perceived work ability as well as not smoking on  
26  
27 daily basis is associated to a favourable prognosis in a working population with long-duration  
28  
29 activity-limiting neck/back pain. However, fulfilling both criteria seem to have no synergistic  
30  
31 prognostic effect.  
32  
33

## 34 Acknowledgement

35  
36  
37 Thanks to Peeter Fredlund, Research Statistician at Karolinska Institutet and SLL Centre for  
38  
39 Epidemiology and Community Medicine, Stockholm, for providing us with the data.  
40  
41  
42

## 43 Contributors

44  
45  
46 TB, LWH, ML and ES contributed to the conceptualisation and  
47  
48 methodology of the study. JH approved the conceptualisation and method and provided the  
49  
50 data resources. Based on a protocol approved by all authors TB made the statistical analyses  
51  
52 and wrote the first draft of the manuscript. All authors contributed to the interpretation of the  
53  
54 results and critically revised the manuscript and approved the last manuscript version.  
55  
56  
57  
58  
59  
60

## Funding

This study was supported by AFA Insurance, grant number 170095. The funders had no role in study design, data collection and analysis, decision to publish, or preparation of the manuscript.

## Competing interests

Non to declare.

## Data availability statement

Data are available upon reasonable request. Due to ethical restrictions and laws (GDPR) of disclosing personal data, authors have to seek permission to allow us to make the data used in this study available. Data will be available upon request after permission is granted from the Karolinska Institutet's Ethics Review Board in Stockholm. Inquiries for data access should first be sent to [eva.skillgate@ki.se](mailto:eva.skillgate@ki.se), who will then contact the ethics board for permission to openly share the data.

## References

1. Vos T, Abajobir AA, Abate KH, et al. Global, regional, and national incidence, prevalence, and years lived with disability for 328 diseases and injuries for 195 countries, 1990–2016: a systematic analysis for the Global Burden of Disease Study 2016. *The Lancet*. 2017;390(10100):1211-59.
2. Hartvigsen J, Hancock MJ, Kongsted A, et al. What low back pain is and why we need to pay attention. *The Lancet*. 2018;391(10137):2356-67.
3. Hoy DG, Protani M, De R, Buchbinder R. The epidemiology of neck pain. *Best Pract Res Clin Rheumatol*. 2010;24(6):783-92.

- 1  
2  
3 4. Cochrane A, Higgins NM, Rothwell C, et al. Work Outcomes in Patients Who  
4 Stay at Work Despite Musculoskeletal Pain. *J Occup Rehabil.* 2018;28(3):559-67.  
5  
6
- 7 5. Schofield DJ, Shrestha RN, Percival R, Callander EJ, Kelly SJ, Passey ME.  
8 Early retirement and the financial assets of individuals with back problems. *Eur Spine J.*  
9  
10 2011;20(5):731-6.  
11  
12
- 13 6. Green BN, Johnson CD, Haldeman S, et al. A scoping review of  
14  
15 biopsychosocial risk factors and co-morbidities for common spinal disorders. *PLoS One.*  
16  
17 2018;13(6):e0197987.  
18  
19
- 20 7. Gould R, Ilmarinen J, Järvisalo J, Koskinen S. Dimensions of Work Ability.  
21  
22 Results of the 2000 Health Survey. Vaasa: Waasa Graphics Oy; 2008.  
23  
24
- 25 8. Ilmarinen J. Work ability, a comprehensive concept for occupational health  
26  
27 research and prevention. *Scand J Work Environ Health.* 2009;35(1):1-5.  
28  
29
- 30 9. Ilmarinen J. The Work Ability Index (WAI). *Occupational Medicine.*  
31  
32 2006;57(2):160.  
33  
34
- 35 10. Ahlstrom L, Grimby-Ekman A, Hagberg M, Dellve L. The work ability index  
36  
37 and single-item question: associations with sick leave, symptoms, and health – a prospective  
38  
39 study of women on long-term sick leave. *Scand J Work Environ Health.* 2010;36(5):404-12.  
40  
41
- 42 11. Kinnunen U, Natti J. Work ability score and future work ability as predictors of  
43  
44 register-based disability pension and long-term sickness absence: A three-year follow-up  
45  
46 study. *Scand J Public Health.* 2018;46(3):321-30.  
47  
48
- 49 12. Lundin A, Kjellberg K, Leijon O, Punnett L, Hemmingsson T. The Association  
50  
51 Between Self-Assessed Future Work Ability and Long-Term Sickness Absence, Disability  
52  
53 Pension and Unemployment in a General Working Population: A 7-Year Follow-Up Study. *J*  
54  
55 *Occup Rehabil.* 2016;26(2):195-203.  
56  
57  
58  
59  
60

- 1  
2  
3 13. Reeuwijk KG, Robroek SJ, Niessen MA, Kraaijenhagen RA, Vergouwe Y,  
4 Burdorf A. The Prognostic Value of the Work Ability Index for Sickness Absence among  
5 Office Workers. *PLoS One*. 2015;10(5):e0126969.  
6  
7  
8  
9  
10 14. Sundstrup E, Jakobsen MD, Mortensen OS, Andersen LL. Joint association of  
11 multimorbidity and work ability with risk of long-term sickness absence: a prospective cohort  
12 study with register follow-up. *Scand J Work Environ Health*. 2017;43(2):146-54.  
13  
14  
15  
16 15. Nordstoga AL, Vasseljen O, Meisingset I, Nilsen TIL, Unsgaard-Tondel M.  
17 Improvement in Work Ability, Psychological Distress and Pain Sites in Relation to Low Back  
18 Pain Prognosis: A Longitudinal Observational Study in Primary Care. *Spine (Phila Pa 1976)*.  
19 2019;44(7):E423-e9.  
20  
21  
22  
23  
24 16. Holm LW, Bohman T, Lekander M, Magnusson C, Skillgate E. Risk of  
25 transition from occasional neck/back pain to long-duration activity limiting neck/back pain: a  
26 cohort study on the influence of poor work ability and sleep disturbances in the working  
27 population in Stockholm County. *BMJ Open*. 2020;10(6):e033946.  
28  
29  
30  
31  
32 17. van den Berg TI, Elders LA, de Zwart BC, Burdorf A. The effects of work-  
33 related and individual factors on the Work Ability Index: a systematic review. *Occup Environ*  
34 *Med*. 2009;66(4):211-20.  
35  
36  
37  
38 18. Supplement article: Carroll LJ, Hurwitz EL, Cote P, et al. Research priorities  
39 and methodological implications: the Bone and Joint Decade 2000-2010 Task Force on Neck  
40 Pain and Its Associated Disorders. *Spine*. 2008;33(4 Suppl):S214-20.  
41  
42  
43  
44 19. Hayden JA, Dunn KM, van der Windt DA, Shaw WS. What is the prognosis of  
45 back pain? *Best Pract Res Clin Rheumatol*. 2010;24(2):167-79.  
46  
47  
48  
49 20. Svensson AC, Fredlund P, Laflamme L, et al. Cohort profile: The Stockholm  
50 Public Health Cohort. *Int J Epidemiol*. 2013;42(5):1263-72.  
51  
52  
53  
54  
55  
56  
57  
58  
59  
60



- 1  
2  
3 21. Dionne CE, Dunn KM, Croft PR, et al. A consensus approach toward the  
4 standardization of back pain definitions for use in prevalence studies. *Spine (Phila Pa 1976)*.  
5 2008;33(1):95-103.  
6  
7  
8  
9  
10 22. Tuomi K, Ilmarinen J, Jahkola A, Katajarinne L, Tulkki A. *Work ability index*.  
11 2 ed. Helsinki: Finnish Institute of Occupational Health; 1998.  
12  
13  
14 23. de Zwart BCH, Frings-Dresen MHW, van Duivenbooden JC. Test–retest  
15 reliability of the Work Ability Index questionnaire. *Occupational Medicine*. 2002;52(4):177-  
16 81.  
17  
18  
19  
20 24. Radkiewicz P, Widerszal-Bazyl M. Psychometric properties of Work Ability  
21 Index in the light of comparative survey study. *International Congress Series*. 2005;1280:304-  
22 9.  
23  
24  
25  
26  
27  
28 25. Lundin A, Leijon O, Vaez M, Hallgren M, Torgén M. Predictive validity of the  
29 Work Ability Index and its individual items in the general population. *Scand J Public Health*.  
30 2017;45(4):350-6.  
31  
32  
33  
34  
35 26. Verkerk K, Luijsterburg PA, Miedema HS, Pool-Goudzwaard A, Koes BW.  
36 Prognostic factors for recovery in chronic nonspecific low back pain: a systematic review.  
37 *Phys Ther*. 2012;92(9):1093-108.  
38  
39  
40  
41  
42 27. Lash TL, VanderWeele TJ, Haneuse S, Rothman KJ. *Modern epidemiology*.  
43 Philadelphia, PA: Wolters Kluwer; 2021.  
44  
45  
46  
47 28. Vittinghoff E, Glidden DV, Shiboski SC, McCulloch CE. *Regression Methods*  
48 *in Biostatistics, Linear, Logistic, Survival, and Repeated Measures Models*. 2nd ed. New  
49 York, USA: Springer New York; 2012.  
50  
51  
52  
53 29. Andersson T, Alfredsson L, Kallberg H, Zdravkovic S, Ahlbom A. Calculating  
54 measures of biological interaction. *Eur J Epidemiol*. 2005;20(7):575-9.  
55  
56  
57  
58  
59  
60

- 1  
2  
3 30. Perruccio AV, Power JD, Badley EM. Arthritis onset and worsening self-rated  
4 health: a longitudinal evaluation of the role of pain and activity limitations. *Arthritis Rheum.*  
5 2005;53(4):571-7  
6  
7  
8  
9  
10 31. Shiri R, Karppinen J, Leino-Arjas P, Solovieva S, Viikari-Juntura E. The  
11 association between smoking and low back pain: a meta-analysis. *Am J Med.* 2010;123(1):87  
12 e7-35.  
13  
14  
15  
16 32. Shi Y, Weingarten TN, Mantilla CB, Hooten WM, Warner DO. Smoking and  
17 Pain: Pathophysiology and Clinical Implications. *Anesthesiology.* 2010;113(4):977-92.  
18  
19  
20  
21  
22  
23  
24

## 25 Figure legends

26  
27 **Figure 1** Flow chart describing the inclusion of participants into the study population and the  
28 analyses sample. NP; neck pain, BP; low back pain, PWA; perceived work ability.  
29  
30  
31  
32  
33  
34  
35  
36  
37  
38  
39  
40  
41  
42  
43  
44  
45  
46  
47  
48  
49  
50  
51  
52  
53  
54  
55  
56  
57  
58  
59  
60

1  
2  
3  
4  
5  
6  
7  
8  
9  
10  
11  
12  
13  
14  
15  
16  
17  
18  
19  
20  
21  
22  
23  
24  
25  
26  
27  
28  
29  
30  
31  
32  
33  
34  
35  
36  
37  
38  
39  
40  
41  
42  
43  
44  
45  
46  
47  
48  
49  
50  
51  
52  
53  
54  
55  
56  
57  
58  
59  
60

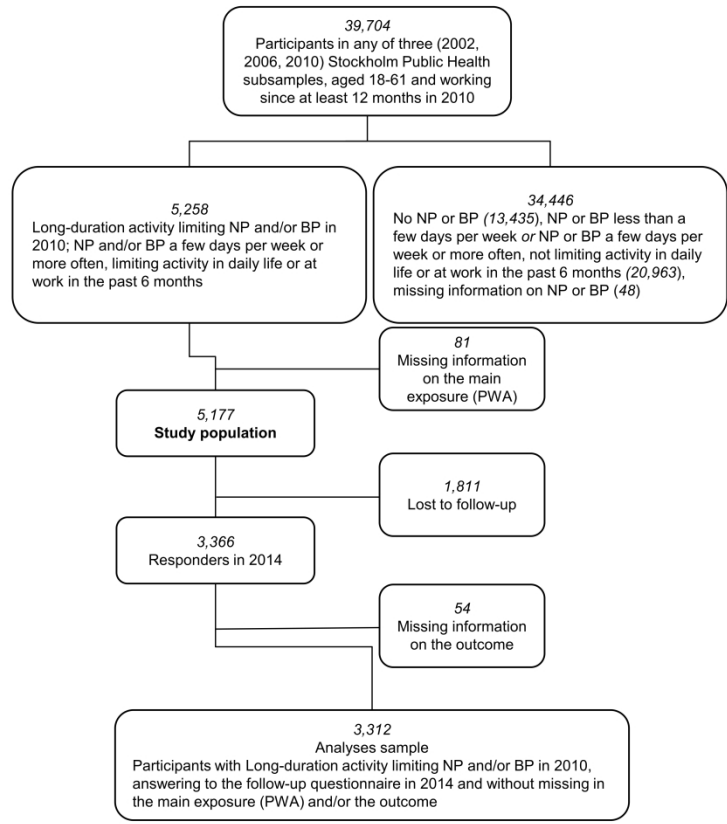

Figure 1. Flow chart describing the inclusion of participants into the study population and the analyses sample. NP; neck pain, BP; low back pain, PWA; perceived work ability.

383x511mm (300 x 300 DPI)

## Appendix Potential confounding factors.

| Potential confounder                           | Measurement                                                                                                                                                                                                  | Categorisation in the analyses                                                                                                                                                                        |
|------------------------------------------------|--------------------------------------------------------------------------------------------------------------------------------------------------------------------------------------------------------------|-------------------------------------------------------------------------------------------------------------------------------------------------------------------------------------------------------|
| Daily smoking <sup>a</sup>                     | "Do you currently smoke daily or almost daily?"                                                                                                                                                              | No, yes                                                                                                                                                                                               |
| Self-perceived work ability <sup>b</sup>       | "How do you rate your current work ability with respect to the physical demands/mental demands of your work"                                                                                                 | Good, moderate, and poor                                                                                                                                                                              |
| Sex                                            | Sex at baseline 2010                                                                                                                                                                                         | Men, women (no other alternatives available)                                                                                                                                                          |
| Age                                            | Age at baseline 2010                                                                                                                                                                                         | Continuous and in quartiles (18-38), (39-46), (47-54), (55-61)                                                                                                                                        |
| Body mass index (BMI)                          | Weight/height <sup>2</sup> (kg/m <sup>2</sup> )                                                                                                                                                              | Categorical; underweight (<18.5), normal weight (18.5-24.9), overweight (25-29.9), obese (≥30)                                                                                                        |
| Socioeconomic status (SES)                     | According to the classification from Statistics Sweden. Based on current occupation and education for the economically active population.                                                                    | Unskilled/semiskilled worker, skilled worker, low level non-manual employees, middle level non-manual employees, high level non-manual employees/self-employed, self-employed (other than high level) |
| Household                                      | "Do you live together with someone?"                                                                                                                                                                         | Categorical; living together with adult/s and child/ren, living alone, living with child/children only                                                                                                |
| Headache/migraine                              | "Do you have headache or migraine?"                                                                                                                                                                          | No, yes; somewhat or severe                                                                                                                                                                           |
| Psychological distress <sup>1,2</sup>          | Based on the 12-item General Health Questionnaire (GHQ-12), using the scoring system 0-0-1-1.                                                                                                                | No (0-2), mild (3-6), severe (7-12)                                                                                                                                                                   |
| Personal support <sup>2,3</sup>                | "Do you know persons who can provide you with personal support for personal problems or crises in your life?"                                                                                                | No-usually not or never, yes-always or for the most part                                                                                                                                              |
| Sleep disturbances                             | "Do you have sleep disturbances"                                                                                                                                                                             | No, yes; somewhat or severe                                                                                                                                                                           |
| Sedentary leisure time                         | "Refer to your leisure physical activity during the past 12 months? If the activities vary during the year and during a week, refer to an average." Sitting/watching TV/reading during leisure time.         | Categorical: less than 2 hours/day, 2-3 hours/day, more than 3 hours/day                                                                                                                              |
| Leisure physical activity - moderate intensity | "Refer to your leisure physical activity during the past 12 months? If the activities vary during the year and during a week, refer to an average." Walking/biking during leisure time.                      | Categorical: less than 20 minutes/day, 20-40 minutes/day, more than 40 minutes/day                                                                                                                    |
| Leisure physical activity - high intensity     | Refer to your leisure physical activity during the past 12 months? If the activities vary during the year and during a week, refer to an average." Exercise, other than walking/biking, during leisure time. | Categorical: less than 1 hour/week, 1-2 hours/week, more than 2 hours/week                                                                                                                            |
| Physical workload <sup>4</sup>                 | "Refer to your physical activity during your daily activity and/or work during the past 12 months? If the activity vary during the year and during a week, refer to an average."                             | Categorical; sedentary at least to 50 %, standing/walking/some lifting, walking/lifting/heavy work                                                                                                    |
| Subsample participation <sup>c</sup>           | Refers to the subsample of the Stockholm Public Health Cohort the participants belonged to.                                                                                                                  | Categorical: 2002/2007/2010/2014, 2006/2010/2014, 2010/2014                                                                                                                                           |

<sup>a</sup> Daily smoking was assessed as a potential confounder in the analyses with self-perceived work ability as exposure. <sup>b</sup> Self-perceived work ability was assessed as a potential confounder in the analyses with daily smoking as exposure. <sup>c</sup> Subsample participation was included in all adjusted models order to adjust for potential systematic difference between the subsamples. <sup>#</sup> Bibliographical references to definition and psychometric properties of the factors.

- Goldberg DP, Gater R, Sartorius N et al. The validity of two versions of the GHQ in the WHO study of mental illness in general health care. *Psychol Med.* 1997;27(1):191-7.
- McDowell I. *Measuring health a guide to rating scales and questionnaires.* 3rd ed. New York ; Oxford: Oxford University Press; 2006. xvi, 748 p
- Unden AL, Orth-Gomer K. Development of a social support instrument for use in population surveys. *Soc Sci Med.* 1989;29(12):1387-92.4. Leijon O, Wiktorin C, Harenstam A, Karlqvist L. Validity of a self-administered questionnaire for assessing physical work loads in a general population. *J Occup Environ Med.* 2002;44(8):724-35.

STROBE Statement—Checklist of items that should be included in reports of *cohort studies*

|                              | Item No | Recommendation                                                                                                                                                                                                                                                                                                                                                                                                                                                                                                                            |
|------------------------------|---------|-------------------------------------------------------------------------------------------------------------------------------------------------------------------------------------------------------------------------------------------------------------------------------------------------------------------------------------------------------------------------------------------------------------------------------------------------------------------------------------------------------------------------------------------|
| <b>Title and abstract</b>    | 1       | (a) Indicate the study's design with a commonly used term in the title or the abstract<br><b>Page 1.</b><br>(b) Provide in the abstract an informative and balanced summary of what was done and what was found <b>Page 2-4.</b>                                                                                                                                                                                                                                                                                                          |
| <b>Introduction</b>          |         |                                                                                                                                                                                                                                                                                                                                                                                                                                                                                                                                           |
| Background/rationale         | 2       | Explain the scientific background and rationale for the investigation being reported<br><b>Page 5 and 6.</b>                                                                                                                                                                                                                                                                                                                                                                                                                              |
| Objectives                   | 3       | State specific objectives, including any prespecified hypotheses<br><b>Page 6, last paragraph.</b>                                                                                                                                                                                                                                                                                                                                                                                                                                        |
| <b>Methods</b>               |         |                                                                                                                                                                                                                                                                                                                                                                                                                                                                                                                                           |
| Study design                 | 4       | Present key elements of study design early in the paper <b>Page 7, first paragraph.</b>                                                                                                                                                                                                                                                                                                                                                                                                                                                   |
| Setting                      | 5       | Describe the setting, locations, and relevant dates, including periods of recruitment, exposure, follow-up, and data collection <b>Page 7, first paragraph, and Figure 1.</b>                                                                                                                                                                                                                                                                                                                                                             |
| Participants                 | 6       | (a) Give the eligibility criteria, and the sources and methods of selection of participants. Describe methods of follow-up <b>Page 7, first paragraph, and Figure 1.</b><br>(b) For matched studies, give matching criteria and number of exposed and unexposed <b>N/A.</b>                                                                                                                                                                                                                                                               |
| Variables                    | 7       | Clearly define all outcomes, exposures, predictors, potential confounders, and effect modifiers. Give diagnostic criteria, if applicable <b>Page 7-9 and Appendix.</b>                                                                                                                                                                                                                                                                                                                                                                    |
| Data sources/<br>measurement | 8*      | For each variable of interest, give sources of data and details of methods of assessment (measurement). Describe comparability of assessment methods if there is more than one group <b>Page 7-10 and Appendix.</b>                                                                                                                                                                                                                                                                                                                       |
| Bias                         | 9       | Describe any efforts to address potential sources of bias<br><b>Page 9 (confounding), Page 10 (Additional analyses).</b>                                                                                                                                                                                                                                                                                                                                                                                                                  |
| Study size                   | 10      | Explain how the study size was arrived at <b>Page 7, first paragraph and Figure 1.</b>                                                                                                                                                                                                                                                                                                                                                                                                                                                    |
| Quantitative variables       | 11      | Explain how quantitative variables were handled in the analyses. If applicable, describe which groupings were chosen and why <b>Page 8-10 and Appendix.</b>                                                                                                                                                                                                                                                                                                                                                                               |
| Statistical methods          | 12      | (a) Describe all statistical methods, including those used to control for confounding<br><b>Page 9 and 10, "Statistics".</b><br>(b) Describe any methods used to examine subgroups and interactions<br><b>Page 9 and 10, "Statistics".</b><br>(c) Explain how missing data were addressed<br><b>Page 9 and 10, "Statistics".</b><br>(d) If applicable, explain how loss to follow-up was addressed<br><b>Page 9 and 10, "Statistics" and Figure 1.</b><br>(e) Describe any sensitivity analyses<br><b>Page 10, "Additional analyses".</b> |
| <b>Results</b>               |         |                                                                                                                                                                                                                                                                                                                                                                                                                                                                                                                                           |
| Participants                 | 13*     | (a) Report numbers of individuals at each stage of study—eg numbers potentially eligible, examined for eligibility, confirmed eligible, included in the study, completing follow-up, and analysed <b>Figure 1, Table 1, 2 and 3.</b><br>(b) Give reasons for non-participation at each stage <b>Figure 1.</b><br>(c) Consider use of a flow diagram <b>Figure 1.</b>                                                                                                                                                                      |
| Descriptive data             | 14*     | (a) Give characteristics of study participants (eg demographic, clinical, social) and information on exposures and potential confounders <b>Table 1 and Appendix.</b>                                                                                                                                                                                                                                                                                                                                                                     |

|                          |     |                                                                                                                                                                                                                                                                                                                                                                                                                                                                                                             |
|--------------------------|-----|-------------------------------------------------------------------------------------------------------------------------------------------------------------------------------------------------------------------------------------------------------------------------------------------------------------------------------------------------------------------------------------------------------------------------------------------------------------------------------------------------------------|
|                          |     | (b) Indicate number of participants with missing data for each variable of interest <b>Table 1 and Figure 1.</b>                                                                                                                                                                                                                                                                                                                                                                                            |
|                          |     | (c) Summarise follow-up time (eg, average and total amount) <b>N/A.</b>                                                                                                                                                                                                                                                                                                                                                                                                                                     |
| Outcome data             | 15* | Report numbers of outcome events or summary measures over time <b>Page 11, Table 2 and 3.</b>                                                                                                                                                                                                                                                                                                                                                                                                               |
| Main results             | 16  | (a) Give unadjusted estimates and, if applicable, confounder-adjusted estimates and their precision (eg, 95% confidence interval). Make clear which confounders were adjusted for and why they were included <b>Page 14, Table 2 and Table 3.</b><br>(b) Report category boundaries when continuous variables were categorized <b>Appendix and Table 1.</b><br>(c) If relevant, consider translating estimates of relative risk into absolute risk for a meaningful time period <b>Page 16 and Table 2.</b> |
| Other analyses           | 17  | Report other analyses done—eg analyses of subgroups and interactions, and sensitivity analyses <b>Page 16, last paragraph. Page 18, "Additional results" and Table 3.</b>                                                                                                                                                                                                                                                                                                                                   |
| <b>Discussion</b>        |     |                                                                                                                                                                                                                                                                                                                                                                                                                                                                                                             |
| Key results              | 18  | Summarise key results with reference to study objectives <b>Page 18 and first paragraph at page 19.</b>                                                                                                                                                                                                                                                                                                                                                                                                     |
| Limitations              | 19  | Discuss limitations of the study, taking into account sources of potential bias or imprecision. Discuss both direction and magnitude of any potential bias <b>Page 19 last paragraph. Page 20 and page 21 paragraph 1 and 2.</b>                                                                                                                                                                                                                                                                            |
| Interpretation           | 20  | Give a cautious overall interpretation of results considering objectives, limitations, multiplicity of analyses, results from similar studies, and other relevant evidence <b>Page 21, last paragraph, and page 22 first paragraph.</b>                                                                                                                                                                                                                                                                     |
| Generalisability         | 21  | Discuss the generalisability (external validity) of the study results <b>Page 21, last paragraph, page 22 first paragraph and in the conclusion.</b>                                                                                                                                                                                                                                                                                                                                                        |
| <b>Other information</b> |     |                                                                                                                                                                                                                                                                                                                                                                                                                                                                                                             |
| Funding                  | 22  | Give the source of funding and the role of the funders for the present study and, if applicable, for the original study on which the present article is based <b>Page 23, "Funding".</b>                                                                                                                                                                                                                                                                                                                    |

\*Give information separately for exposed and unexposed groups.

**Note:** An Explanation and Elaboration article discusses each checklist item and gives methodological background and published examples of transparent reporting. The STROBE checklist is best used in conjunction with this article (freely available on the Web sites of PLoS Medicine at <http://www.plosmedicine.org/>, Annals of Internal Medicine at <http://www.annals.org/>, and Epidemiology at <http://www.epidem.com/>). Information on the STROBE Initiative is available at <http://www.strobe-statement.org>.

# BMJ Open

## The influence of work ability and smoking on the prognosis of long-duration activity-limiting neck/back pain – a cohort study of a Swedish working population

|                                 |                                                                                                                                                                                                                                                                                                                                                                                                                                                                                                                                                                                             |
|---------------------------------|---------------------------------------------------------------------------------------------------------------------------------------------------------------------------------------------------------------------------------------------------------------------------------------------------------------------------------------------------------------------------------------------------------------------------------------------------------------------------------------------------------------------------------------------------------------------------------------------|
| Journal:                        | <i>BMJ Open</i>                                                                                                                                                                                                                                                                                                                                                                                                                                                                                                                                                                             |
| Manuscript ID                   | bmjopen-2021-054512.R2                                                                                                                                                                                                                                                                                                                                                                                                                                                                                                                                                                      |
| Article Type:                   | Original research                                                                                                                                                                                                                                                                                                                                                                                                                                                                                                                                                                           |
| Date Submitted by the Author:   | 18-Mar-2022                                                                                                                                                                                                                                                                                                                                                                                                                                                                                                                                                                                 |
| Complete List of Authors:       | Bohman, Tony; Karolinska Institutet, Institute of Environmental Medicine; Dalarna University School of Education Health and Social Studies<br>Holm, Lena; Karolinska Institutet, Institute of Environmental Medicine<br>Lekander, Mats; Stockholm University, Stress Research Institute; Karolinska Institutet, Department of Clinical Neuroscience<br>Hallqvist, Johan; Uppsala University, Department of Public Health and Caring Sciences<br>Skillgate, Eva; Karolinska Institutet, Institute of Environmental Medicine; Sophiahemmet University, Department of health promotion science |
| <b>Primary Subject Heading</b>: | Epidemiology                                                                                                                                                                                                                                                                                                                                                                                                                                                                                                                                                                                |
| Secondary Subject Heading:      | Public health                                                                                                                                                                                                                                                                                                                                                                                                                                                                                                                                                                               |
| Keywords:                       | Musculoskeletal disorders < ORTHOPAEDIC & TRAUMA SURGERY, PUBLIC HEALTH, EPIDEMIOLOGY, Back pain < ORTHOPAEDIC & TRAUMA SURGERY, Spine < ORTHOPAEDIC & TRAUMA SURGERY                                                                                                                                                                                                                                                                                                                                                                                                                       |
|                                 |                                                                                                                                                                                                                                                                                                                                                                                                                                                                                                                                                                                             |

SCHOLARONE™  
Manuscripts

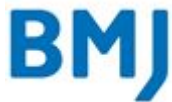

I, the Submitting Author has the right to grant and does grant on behalf of all authors of the Work (as defined in the below author licence), an exclusive licence and/or a non-exclusive licence for contributions from authors who are: i) UK Crown employees; ii) where BMJ has agreed a CC-BY licence shall apply, and/or iii) in accordance with the terms applicable for US Federal Government officers or employees acting as part of their official duties; on a worldwide, perpetual, irrevocable, royalty-free basis to BMJ Publishing Group Ltd ("BMJ") its licensees and where the relevant Journal is co-owned by BMJ to the co-owners of the Journal, to publish the Work in this journal and any other BMJ products and to exploit all rights, as set out in our [licence](#).

The Submitting Author accepts and understands that any supply made under these terms is made by BMJ to the Submitting Author unless you are acting as an employee on behalf of your employer or a postgraduate student of an affiliated institution which is paying any applicable article publishing charge ("APC") for Open Access articles. Where the Submitting Author wishes to make the Work available on an Open Access basis (and intends to pay the relevant APC), the terms of reuse of such Open Access shall be governed by a Creative Commons licence – details of these licences and which [Creative Commons](#) licence will apply to this Work are set out in our licence referred to above.

Other than as permitted in any relevant BMJ Author's Self Archiving Policies, I confirm this Work has not been accepted for publication elsewhere, is not being considered for publication elsewhere and does not duplicate material already published. I confirm all authors consent to publication of this Work and authorise the granting of this licence.



1  
2  
3  
4 The influence of work ability and smoking on the prognosis of long-  
5  
6  
7 duration activity-limiting neck/back pain – a cohort study of a  
8  
9  
10  
11 Swedish working population  
12

13 Tony Bohman<sup>1,2\*</sup>, Lena W Holm<sup>1</sup>, Mats Lekander<sup>3,4</sup>, Johan Hallqvist<sup>5</sup>, Eva Skillgate<sup>1,6</sup>  
14  
15  
16  
17

18 <sup>1</sup>Institute of Environmental Medicine, Unit of Intervention and Implementation Research for  
19  
20 Worker Health, Karolinska Institutet, Stockholm, Sweden  
21

22 <sup>2</sup>School of Education, Health and Social Studies, Dalarna University, Sweden  
23

24 <sup>3</sup>Stress Research Institute, Stockholm University, Sweden  
25

26 <sup>4</sup>Department of Clinical Neuroscience, Karolinska Institutet, Stockholm, Sweden  
27

28 <sup>5</sup>Department of Public Health and Caring Sciences, Family Medicine and Preventive  
29  
30 Medicine, Uppsala University, Uppsala, Sweden  
31  
32

33 <sup>6</sup>Department of Health Promotion Science, Musculoskeletal & Sports Injury Epidemiology  
34  
35 Center, Sophiahemmet University, Stockholm, Sweden  
36  
37

38 \*Corresponding author:  
39

40 Tony Bohman  
41

42  
43 Institute of Environmental Medicine, Unit of Intervention and Implementation Research for  
44  
45 Worker Health, Karolinska Institutet, Box 210, SE-171 77 Stockholm, Sweden  
46  
47

48 E-mail: [tony.bohman@ki.se](mailto:tony.bohman@ki.se)  
49

50 Cell phone: +46 70 299 62 63  
51  
52  
53  
54  
55  
56  
57  
58  
59  
60

## Abstract

### Objectives

Long-duration activity-limiting neck/back pain is common, but the knowledge of what work and lifestyle factors that influence the prognosis is sparse. The objective was therefore to here evaluate if two factors, good self-perceived work ability and no daily smoking, are associated with a favourable prognosis of long-duration activity-limiting neck/back pain in a working population, and if these exposures have a synergistic prognostic effect.

### Design

A prospective cohort study based on three subsamples from the Stockholm Public Health Cohort.

### Settings

A working population in Stockholm County, Sweden.

### Participants

Individuals, 18-61 years old, reporting long-duration activity-limiting neck/back pain the previous six months at baseline in 2010 (n=5,177).

### Measures

The exposures were: self-perceived work ability (categorised into good, moderate, and poor), and daily smoking (no/yes). The outcome in 2014 was “absence of long-duration activity-limiting neck/back pain” the previous six months representing a favourable prognosis of reported problems at baseline in 2010. Risk ratios (RRs) and risk differences (RDs) with 95% CI was estimated by general linear regressions, and the synergistic effect by the synergy index (SI) with 95% CI.

## Results

Participants with moderate or good work ability, respectively, had an adjusted RR for a favourable prognosis of 1.37 (95% CI: 1.11-1.69), and 1.80 (1.49-2.17) in comparison to participants with poor work ability. The corresponding adjusted RD were 0.07 (0.02-0.11) and 0.17 (0.12-0.22). Participants not smoking on daily basis had an adjusted RR of 1.21 (1.02-1.42), and an adjusted RD of 0.05 (0.01-0.10) for a favourable outcome compared to daily smokers. The adjusted SI was 0.92 (0.60-1.43).

## Conclusion

For participants with long-duration activity-limiting neck/back pain, moderate or good self-perceived work ability and not being a daily smoker were associated with a favourable prognosis but having both exposures seemed to have no synergistic prognostic effect.

Keywords: disability evaluation, musculoskeletal pain, public health, tobacco use

## Strengths and limitations of this study

- The longitudinal design ensures temporality and the large number of potential confounders considered supports a possible causal association between the exposers and the outcome.
- The large sample size and robust analyses strengthens the internal validity.
- The main limitations of this study are possible misclassification of the exposures and the outcome, a relatively large loss to follow-up and a possible change of exposure category during the follow-up period of four years, although these limitations most probably lead to an underestimation of the associations studied.

- 1  
2  
3  
4  
5  
6  
7  
8  
9  
10  
11  
12  
13  
14  
15  
16  
17  
18  
19  
20  
21  
22  
23  
24  
25  
26  
27  
28  
29  
30  
31  
32  
33  
34  
35  
36  
37  
38  
39  
40  
41  
42  
43  
44  
45  
46  
47  
48  
49  
50  
51  
52  
53  
54  
55  
56  
57  
58  
59  
60
- There is a possible risk that reversed causation have influenced the analyses with perceived work ability as exposure, but the additional analyses indicates that this risk is small.

For peer review only

## Introduction

According to the Global Burden of Disease study, neck pain and back pain are among the top causes for “years lived with disability”, with a high and rising prevalence globally (1). Most neck and back problems resolve, but many individuals experience pain for a long time following onset (2, 3). Between 17% to 70% of individuals with neck pain report activity-limiting pain (3). Long-duration activity-limiting neck/back pain (LANBP) is most prevalent in working age, and often decrease work performance (2, 4). From a public health perspective, LANBP adds to the societal and individual burden as it is a common cause for absenteeism and early retirement (5). Still, and in accordance with current recommendations, many individuals with musculoskeletal pain go to work (4).

One way to address this burden of LANBP is to increase the understanding of modifiable lifestyle and work-related factors associated to a favourable prognosis and their potential interactions. Research about prognosis of LANBP have so far focused on factors of potential importance for the transition from acute/sub-acute neck and back pain to LANBP, and several biopsychosocial factors are suggested to be associated to such an unfavourable prognosis. Examples of such factors are smoking, low physical activity, depression, anxiety, and low work satisfaction (2, 6). On the other hand, only greater optimism, good social support, positive coping and exercise/sport activities are proposed as factors associated to a favourable prognosis for long-duration and activity-limiting neck pain, and none for back pain (6). Thus, knowledge of if work-related factors and lifestyle factors, other than physical activities, associate to a favourable prognosis of LANBP is lacking.

The multidimensional work ability model was introduced in Finland in the 1980s in order to study self-perceived work ability in relation to work-disability and health (7, 8). According to the model, self-perceived work ability is based on health and functional capacity and built on a balance between a person’s resources such as competence, values, attitudes, motivation, and

1  
2  
3 work demands. Self-perceived work ability is commonly assessed by the Work Ability Index  
4 (WAI) or by single items of the instrument (9). Work ability is associated with health and  
5 health related outcomes, eg depression, osteoarthritis, neck and back pain, sickness absence  
6 and general health (7, 10). Furthermore, the total WAI or single WAI items seems to be  
7 valuable for predicting sickness absence in healthy as well in unhealthy populations, with  
8 good work ability being a protective factor in all diseases studied (10-14). However, work  
9 ability in relation to the prognosis of neck/back pain is rarely studied. Nordstoga et al.,  
10 studying back pain patients referred to physiotherapy, found no association between baseline  
11 work ability and disability or pain three months later (15). Ahlström et al., followed Swedish  
12 female workers on long-term sick leave for 12 months, the majority with neck pain, and found  
13 work ability to predict the future degree of neck pain (10). In a recent study from our group,  
14 we found that poor work ability, assessed with the second WAI item (perceived mental and/or  
15 physical work ability), increased the risk of LANBP in workers with occasional neck- and/or  
16 back pain (16).

17  
18  
19  
20  
21  
22  
23  
24  
25  
26  
27  
28  
29  
30  
31  
32  
33  
34  
35  
36  
37  
38  
39  
40  
41  
42  
43  
44  
45  
46  
47  
48  
49  
50  
51  
52  
53  
54  
55  
56  
57  
58  
59  
60

So far, we know that smoking is associated with the onset of neck and back pain, and with the transition from acute/subacute to long-duration back pain, but we do not know if being a non-smoker is associated with a favourable prognosis of LANBP (2, 6). If so, and considering a known association between smoking and poor work ability, examine their potential interaction on the prognosis of LANBP would enhance our understanding and meet the demand for studies examining such interactions from reviews on the prognosis of neck and back pain (17, 18, 19).

Therefore, the objective of this study was to evaluate if good self-perceived work ability and no daily smoking are associated with a favourable prognosis of LANBP in a working population, and if these exposures have a synergistic prognostic effect.

## Methods

### Design and study population

In this prospective cohort study, we used merged data from three subcohorts of the Stockholm Public Health Cohort (SPHC) (20). The SPHC consists of several public health surveys of individuals randomly selected from the adult population of Stockholm County. The first subcohort included individuals selected in 2002 and followed up in 2007, 2010 and 2014. The second cohort included individuals selected in 2006 and followed up in 2010 and 2014, and the third subcohort individuals selected in 2010 and followed up in 2014. Approximately 74,000 individuals from the subcohorts responded to the questionnaire in 2010, which was used as baseline in the present study. Of these, approximately 50,000 individuals (68%) responded to the questionnaire in 2014, used as the follow-up survey in the present study. Of the responders in 2010, 39,704 were 18-61 years of age and were working since at least 12 months, representing our “working population”. We chose the age limit of 61 in 2010 to ensure that most of our population would still be working in 2014 as 65 was the norm for retirement age in Sweden at the time of the data collection. Figure 1 describes the inclusion of participants into the study population and the analyses sample.

Neck and back pain at baseline in 2010 were assessed with the questions; “Have you had any pain in your upper back or neck in the preceding 6 months?”, and “Have you had any pain in your lower back in the preceding 6 months?”. Both questions were followed by the question; “If yes: Do these problems limit your ability to work or carry out other daily activities?”.

Individuals answering, “Yes, on average, a few days per week or more” to at least one of the first two questions and then “Yes, to a high degree *or* to some degree” to the following question were considered as having LANBP. The questions defining LANBP incorporates

1  
2  
3 duration, frequency and the impact on daily activity and work which is recommended when  
4  
5 classifying neck and back pain (18, 21).  
6

7 Ethical approval was received from the regional ethical board in Stockholm (Dnr; 2007/545-  
8  
9 31, 2013/497-32 and 2015/1204-32).  
10  
11

## 12 13 Exposures

14  
15 The exposure “self-perceived work ability” (PWA) was categorised based on the second item  
16  
17 of the WAI (7, 9, 22). The item consists of two questions, one regarding physical demands  
18  
19 and one regarding mental demands at work, respectively: “How do you rate your current work  
20  
21 ability with respect to the *physical demands/mental demands* of your work”. The response  
22  
23 alternatives were “Very good”, “Rather good”, “Moderate”, “Rather poor” and “Very poor”.  
24  
25

26  
27 The answers were dichotomized into good (very good or rather good) and poor (moderate,  
28  
29 rather poor or very poor) physical and mental work ability, respectively. Finally, PWA was  
30  
31 operationalised into three categories: good PWA (good physical *and* good mental work  
32  
33 ability), moderate PWA (good physical *or* good mental work ability, but not both) and poor  
34  
35 PWA (poor physical *and* poor mental work ability).  
36  
37

38  
39 The WAI is considered an internally coherent, reliable, and valid instrument appropriate for  
40  
41 use in cross-national research (9, 23, 24). Most often, the full WAI is used in research, but  
42  
43 also single items have been utilised as measures, for example the second WAI item used to  
44  
45 operationalise the exposure in the present study (10-12, 25).  
46  
47

48 The exposure “daily smoking” (DS) was dichotomized by the answer yes or no to the  
49  
50 question: “Do you currently smoke daily or almost daily?”.  
51  
52

## 53 54 Outcome

55  
56 The outcome “absence of long-duration activity-limiting neck/back pain” in 2014 represents a  
57  
58 favourable prognosis of reported problems at baseline in 2010. The definition was based on  
59  
60



1  
2  
3 the same questions used defining the study population. Participants defined as having a  
4 favourable prognosis (cases) were those reporting no neck/back pain *or* neck/back pain not  
5 limiting their activity in daily life or at work the preceding six months. Consequently, non-  
6 limiting their activity in daily life or at work the preceding six months. Consequently, non-  
7 cases have had pain of any duration and frequency in the neck and/or back that limited  
8 activity in daily life or at work to some or to a high degree during the preceding six months.  
9  
10  
11  
12  
13  
14

## 15 Potential confounders

16  
17  
18 Potential confounders for the association between the exposure and the outcome were chosen  
19 based on literature, theoretical and clinical considerations, and availability in the  
20 questionnaire (2, 3, 6, 26). Potential confounders are presented in the Appendix. Most of the  
21 items used to measure the potential confounders have regularly been used in Swedish public  
22 health surveys since 1975, and since 2002 in the SPHC (20).  
23  
24  
25  
26  
27  
28  
29

## 30 Statistics

31  
32  
33 Stata version 14.2 (StataCorp College Station, TX, USA) were used for statistical analyses.  
34  
35 The association between the exposures and the outcome were estimated using general linear  
36 models with a binomial distribution and a log-link and reported as risk ratio (RR) and risk  
37 difference (RD) with corresponding 95% confidence intervals (CI). The exposures, PWA and  
38 DS were assessed in separate general linear models. Potential confounders were identified by  
39 reviewing the literature of prognostic factors, clinical considerations, and availability. After  
40 careful discussion about if they instead possibly could be intermediators or colliders, the  
41 potential confounders were introduced into the crude models one by one. Potential  
42 confounders changing the estimated RR by 5% or more were considered confounders and  
43 were included in the final adjusted models (27). DS was tested as a confounder in the analyses  
44 with PWA as exposure and PWA was tested as a confounder in the analyses with DS as  
45 exposure. A variable indicating subsample participation was included in all models to adjust  
46  
47  
48  
49  
50  
51  
52  
53  
54  
55  
56  
57  
58  
59  
60

1  
2  
3 for potential systematic difference between the subcohorts. The general linear models were  
4 performed using complete-subject analyses. The Chi-square test was used to test a potential  
5 dose-response effect (28).  
6  
7

8  
9  
10 To calculate the potential synergistic effect of PWA and DS on the outcome, we used the  
11 EpiNET's epidemiological tool (29). We dichotomised PWA into good PWA and  
12 moderate/poor PWA and then combined the dichotomized PWA and DS in a dummy variable,  
13 where the reference group was set to those having moderate/poor PWA and being daily  
14 smokers. The dummy variable was then used as the independent factor in a crude and an  
15 adjusted logistic regression. The results were presented as RR with corresponding 95% CI  
16 together with the synergy index (SI) with corresponding 95% CI. A SI >1 indicates a joint  
17 effect between two factors greater than the sum of their individual effects.  
18  
19  
20  
21  
22  
23  
24  
25  
26  
27  
28

### 29 Additional analyses

30  
31  
32 Even though all participants reported LANBP at baseline we had no information on the  
33 intensity of LANBP at baseline, which may be an important confounder in the analyses. As  
34 poor self-related health may be a consequence of severe pain intensity, we performed the  
35 adjusted analyses with PWA as exposure stratified by good (very good/good) and poor  
36 (fair/poor/very poor) self-rated health (SRH), as a proxy for the intensity of neck/back pain at  
37 baseline (30).  
38  
39  
40  
41  
42  
43  
44  
45

46 The potential influence of attrition was assessed by comparing the prevalence of the two  
47 exposures among non-responders (n=1,865) to the prevalence among responders (n=3,312)  
48 using Chi-square tests.  
49  
50  
51  
52

### 53 Patient and Public Involvement

54 Patients or the public were not involved in the design or planning of the study.  
55  
56  
57  
58  
59  
60

## Results

Baseline characteristics of the study population are presented in Table 1. The mean age was 46 years (SD 10) and 66% were women. Eighty percent reported good or moderate self-perceived work ability and 84% were not smoking daily. Most participants were non-manual workers or self-employed (65%), and the majority lived together with another adult person, with or without children (77%). At follow-up in 2014, 36% of the participants showed a favourable prognosis of LANBP.

**Table 1** Baseline characteristics by the exposures perceived work ability (PWA) and daily smoking (DS). Study population, n=5,177.

| Baseline characteristics, n (%)                            | Perceived work ability<br>(n=5,177) |            |            | Daily smoking<br>(n=5,138) |          | Int. Missing  |
|------------------------------------------------------------|-------------------------------------|------------|------------|----------------------------|----------|---------------|
|                                                            | Good                                | Moderate   | Poor       | No                         | Yes      | PWA/DS<br>n/n |
| <b>Sex:</b> Women                                          | 3,076 (59)                          | 1,080 (21) | 1,021 (20) | 4,320 (84)                 | 818 (16) | 0/0           |
| <b>Average age,</b> years (SD)                             | 45 (10)                             | 46 (10)    | 47 (10)    | 45 (10)                    | 47 (10)  | 0/0           |
| <b>Perceived work ability:</b> Good                        |                                     |            |            | 2,679 (62)                 | 377 (46) | -/0           |
| Moderate                                                   |                                     |            |            | 888 (21)                   | 186 (23) |               |
| Poor                                                       |                                     |            |            | 753 (17)                   | 255 (31) |               |
| <b>Daily smoking:</b> Yes                                  | 377 (12)                            | 186 (17)   | 255 (25)   |                            |          | 39/-          |
| <b>BMI:</b> Underweight/Normal weight                      | 1,550 (51)                          | 530 (51)   | 408 (41)   | 2,093 (49)                 | 383 (48) | 128/127       |
| Overweight/Obese                                           | 1,457 (49)                          | 522 (49)   | 582 (59)   | 2,122 (51)                 | 413 (52) |               |
| <b>SES:</b> Unskilled/semiskilled worker                   | 435 (15)                            | 219 (22)   | 301 (32)   | 712 (17)                   | 236 (30) | 267/263       |
| Skilled worker                                             | 393 (13)                            | 173 (17)   | 183 (20)   | 566 (14)                   | 174 (22) |               |
| Low level non-manual employees                             | 465 (16)                            | 137 (13)   | 120 (13)   | 603 (15)                   | 115 (15) |               |
| Middle level non-manual employees                          | 806 (27)                            | 255 (25)   | 180 (19)   | 1,111 (27)                 | 124 (16) |               |
| High level non-manual employees/self-employed              | 849 (29)                            | 238 (23)   | 156 (16)   | 1,103 (27)                 | 131 (17) |               |
| <b>Household:</b> Living with adult, with/without children | 2,463 (81)                          | 791 (74)   | 685 (68)   | 3,361 (78)                 | 555 (68) | 40/36         |
| Living alone/Living with children only                     | 601 (19)                            | 277 (26)   | 320 (42)   | 928 (22)                   | 258 (32) |               |
| <b>Headache/migraine:</b> Yes                              | 1,330 (44)                          | 556 (53)   | 631 (66)   | 2,084 (50)                 | 416 (53) | 160/152       |

|                                                                   |            |          |          |            |          |         |
|-------------------------------------------------------------------|------------|----------|----------|------------|----------|---------|
| <b>Psychological distress: No</b>                                 | 2,403 (78) | 596 (56) | 382 (38) | 2,876 (67) | 479 (59) | 25/24   |
| Mild/Severe                                                       | 456 (15)   | 259 (24) | 263 (26) | 801 (19)   | 169 (21) |         |
| Severe                                                            | 207 (7)    | 217 (20) | 369 (36) | 622 (14)   | 167 (20) |         |
| <b>Personal support: No</b>                                       | 359 (12)   | 219 (20) | 307 (30) | 698 (16)   | 182 (22) | 32/28   |
| <b>Sleep disturbances: Yes</b>                                    | 1,254 (42) | 623 (59) | 744 (76) | 2,120 (50) | 480 (61) | 150/144 |
| <b>Sedentary leisure time: &lt;2 hours/day</b>                    | 1,802 (59) | 540 (50) | 502 (50) | 2,441 (57) | 385 (48) | 35/33   |
| >2 hours/day                                                      | 1,253 (41) | 536 (50) | 509 (50) | 1,854 (43) | 425 (52) |         |
| <b>Leisure physical activity, mod intensity: &lt;20 min/day</b>   | 977 (32)   | 389 (36) | 436 (43) | 1,435 (34) | 352 (44) | 52/49   |
| >20 min/day                                                       | 2,073 (68) | 683 (64) | 567 (57) | 2,851 (66) | 456 (56) |         |
| <b>Leisure physical activity, high intensity: &lt;1 hour/week</b> | 1,301 (43) | 532 (50) | 562 (56) | 1,883 (44) | 495 (61) | 45/43   |
| >1 hour/week                                                      | 1,753 (57) | 540 (50) | 444 (44) | 2,404 (56) | 313 (39) |         |
| <b>Physical workload: Sedentary at least 50%</b>                  | 1,801 (60) | 537 (51) | 448 (46) | 2,410 (57) | 361 (46) | 117/114 |
| Standing/walking/some lifting                                     | 727 (24)   | 291 (27) | 319 (33) | 1,094 (26) | 230 (29) |         |
| Walking/lifting/heavy work                                        | 496 (16)   | 232 (22) | 209 (21) | 738 (17)   | 191 (25) |         |
| <b>Subsample participation: 2002/2007/2010/2014</b>               | 781 (25)   | 269 (25) | 233 (23) | 1,106 (26) | 170 (21) | 0/0     |
| 2006/2010/2014                                                    | 1,011 (33) | 352 (33) | 346 (34) | 1,432 (33) | 268 (33) |         |
| 2010/2014                                                         | 1,284 (42) | 459 (42) | 442 (43) | 1,782 (41) | 380 (46) |         |
| <b>Self-rated health: Very good</b>                               | 293 (9)    | 23 (2)   | 12 (1)   | 302 (7)    | 26 (3)   | 49/48   |
| Good                                                              | 1,801 (59) | 336 (32) | 145 (14) | 1,982 (46) | 286 (35) |         |
| Fair                                                              | 877 (29)   | 567 (53) | 536 (53) | 1,585 (37) | 376 (46) |         |
| Poor or very poor                                                 | 82 (3)     | 137 (13) | 319 (32) | 408 (10)   | 125 (16) |         |

**Note:** For a description of the variables and their categorisation see the Appendix. **Abbreviation:** SES; Socioeconomic status.

1  
2  
3 The crude and adjusted associations between self-perceived work ability, daily smoking and a  
4 favourable prognosis of LANBP are presented in Table 2. Socioeconomic status,  
5  
6 headache/migraine and sleep disturbances were identified as confounders in the analyses with  
7  
8 self-perceived work ability as exposure, while socioeconomic status, sleep disturbances and  
9  
10 self-perceived work ability confounded the association between daily smoking and the  
11  
12  
13  
14  
15 outcome.  
16  
17  
18  
19  
20  
21  
22  
23  
24  
25  
26  
27  
28  
29  
30  
31  
32  
33  
34  
35  
36  
37  
38  
39  
40  
41  
42  
43  
44  
45  
46  
47  
48  
49  
50  
51  
52  
53  
54  
55  
56  
57  
58  
59  
60

For peer review only

**Table 2** Associations\* between the exposures perceived work ability (PWA) and daily smoking (DS) in 2010, and a favourable prognosis of long-duration activity-limiting neck and/or back pain in 2014.

| Exposure                      | Cases/total | Crude (n=3,312) |           | Adjusted <sup>a</sup> (n=3,049) |           | Adjusted <sup>a</sup> |           |
|-------------------------------|-------------|-----------------|-----------|---------------------------------|-----------|-----------------------|-----------|
|                               |             | RR              | 95% CI    | RR                              | 95% CI    | RD                    | 95% CI    |
| <b>Perceived work ability</b> |             |                 |           |                                 |           |                       |           |
| Poor                          | 115/596     | 1               |           | 1                               |           | 0                     |           |
| Moderate                      | 203/688     | 1.53            | 1.25-1.87 | 1.37                            | 1.11-1.69 | 0.07                  | 0.02-0.11 |
| Good                          | 873/2,028   | 2.23            | 1.88-2.65 | 1.80                            | 1.49-2.17 | 0.17                  | 0.12-0.22 |
| Exposure                      | Cases/total | Crude (n=3,292) |           | Adjusted <sup>b</sup> (n=3,088) |           | Adjusted <sup>b</sup> |           |
|                               |             | RR              | 95% CI    | RR                              | 95% CI    | RD                    | 95% CI    |
| <b>Daily smoking</b>          |             |                 |           |                                 |           |                       |           |
| Yes                           | 115/459     | 1               |           | 1                               |           | 0                     |           |
| No                            | 1,070/2,833 | 1.51            | 1.28-1.78 | 1.21                            | 1.02-1.42 | 0.05                  | 0.01-0.10 |

\*General linear models with a binomial distribution and a log-link, estimating the risk ratio (RR), or an identity-link, estimating the risk difference (RD), with corresponding 95% confidence intervals (CI). <sup>a</sup>Adjusted for socioeconomic status, headache/migraine, sleep disturbances and subsample participation; <sup>b</sup>Adjusted for socioeconomic status, sleep disturbances, perceived work ability and subsample participation.

1  
2  
3 In comparison to participants with poor work ability participants with moderate or good work  
4 ability, had an adjusted RR for a favourable prognosis of 1.37 (95% CI: 1.11-1.69), and 1.80  
5  
6 (1.49-2.17), respectively. The corresponding adjusted RD were 0.07 (0.02-0.11) and 0.17  
7  
8 (0.12-0.22). Participants not smoking on daily basis had an adjusted RR of 1.21 (1.02-1.42),  
9  
10 and an adjusted RD of 0.05 (0.01-0.10) for a favourable outcome compared to daily smokers.

11  
12  
13  
14 The analyses with self-perceived work ability as exposure showed a significant dose-response  
15  
16 towards a more favourable prognosis with higher work ability ( $p < 0.001$ ).

17  
18  
19 Table 3 shows the result of the evaluation of the synergistic associations between the  
20  
21 exposures and the outcome, resulting in an adjusted SI of 0.92 (95% CI: 0.60-1.43).  
22  
23  
24  
25  
26  
27  
28  
29  
30  
31  
32  
33  
34  
35  
36  
37  
38  
39  
40  
41  
42  
43  
44  
45  
46  
47  
48  
49  
50  
51  
52  
53  
54  
55  
56  
57  
58  
59  
60



**Table 3** Analyses\* of the potential synergistic effects of the two exposures perceived work ability (PWA) and daily smoking (DS), on a favourable prognosis of long-duration activity-limiting neck and/or back pain.

| Exposure                                                  | Cases/total | Crude (n=3,312) |           | Adjusted <sup>a</sup> (n=3,049) |           |
|-----------------------------------------------------------|-------------|-----------------|-----------|---------------------------------|-----------|
|                                                           |             | RR              | 95% CI    | RR                              | 95% CI    |
| Moderate/poor perceived work ability and daily smoking    | 39/253      | 1               |           | 1                               |           |
| Moderate/poor perceived work ability and no daily smoking | 276/1,022   | 1.88            | 1.32-2.66 | 1.61                            | 1.11-2.34 |
| Good perceived work ability and daily smoking             | 76/206      | 2.96            | 1.93-4.54 | 2.33                            | 1.49-3.66 |
| Good perceived work ability and no daily smoking          | 794/1,811   | 3.96            | 2.84-5.52 | 2.80                            | 1.95-4.02 |
| <b>Synergy index</b>                                      |             |                 |           | 0.92                            | 0.60-1.43 |

\*Using EpiNET's epidemiological tool "Epinetcalculation.xlsx" based on the results from logistic regressions. <sup>a</sup>Adjusted for socioeconomic status, headache/migraine, sleep disturbances and subsample participation. **Abbreviations:** RR; risk ratio, CI; confidence interval.

## Additional results

Stratifying the analyses of the exposure self-perceived work ability by good and poor self-rated health, as a proxy for the intensity of neck/back pain at baseline, resulted in similar adjusted RR for the two strata. The RR for a favourable prognosis of LANBP when reporting moderate work ability showed a similar increase for participants with poor self-rated health and participants with good self-rated health, 1.42 (95% CI; 0.93-2.15) and 1.27 (95% CI; 0.98-1.63), compared with participants with poor work ability. The RR were also similar for those reporting good work ability in both strata, 1.72 (95% CI; 1.17-2.53) and 1.56 (95% CI; 1.23-1.96), respectively.

At baseline in 2010, non-responders had a significantly higher prevalence ( $p < 0.001$ ) of individuals with poor self-perceived work ability and daily smokers (23% and 19%) in comparison with responders (18% and 14%).

## Discussion

In this study we found an association between self-perceived work ability and a favourable prognosis of long-duration activity-limiting neck/back pain four years later. The results revealed that individuals in a working population with moderate self-perceived work ability (either good physical or good mental work ability) had a 37% increased chance of a favourable prognosis of long-duration activity-limiting neck/back pain, compared to individuals with poor self-perceived work ability (poor physical and poor mental work ability). The chance of a favourable prognosis was even higher (80%) for individuals reporting good self-perceived work ability (both good physical and good mental work ability). In addition, the results showed that individuals that did not smoke daily had a 21% higher chance of a favourable prognosis than did daily smokers.

1  
2  
3 A possible synergetic effect on a favourable prognosis for participants reporting good work  
4 ability and not smoke on daily basis could not be confirmed.  
5  
6

7 Previously, Nordstoga et al. found no association between baseline work ability and  
8 improvement of back pain or disability in physiotherapy patients with back pain of any  
9 duration, which contrasts with our results (15). Their study included patients with back pain  
10 of any duration, had a follow-up time of only three months, and they used the question  
11 “describe your current work ability compared with the lifetime best (0-10)” as a measure of  
12 self-perceived work ability. More in line with our result, Ahlström et al. found higher baseline  
13 work ability, defined by the same question as Nordstoga et al. and by the full WAI, to predict  
14 lower degree of neck pain at six and 12 months among women on long-term sick-leave (10).  
15 We have not found any previous study of association between smoking and a favourable  
16 prognosis, either for neck or for back pain, or on the synergetic effect of work ability and  
17 smoking.  
18  
19

20 The mechanism for smoking to affect spinal pain is not yet well understood, but increased  
21 levels of pro-inflammatory cytokines, changed pain perception, impaired blood supply, and  
22 impaired oxygen delivery to tissues caused by increased sympathetic outflow has been  
23 suggested (31, 32). The latter could be one possible underlying mechanism to the higher  
24 prevalence of osteoporosis and lumbar disc disease found in smokers compared to non-  
25 smokers (31, 32). As the concept of self-perceived work ability incorporate individual factors,  
26 work-related factors and environmental factors, a specific mechanism for good self-perceived  
27 work ability to associate with a favourable prognosis of LANBP may be difficult to delineate  
28 (7).  
29  
30

31 The present study has some possible limitations. Clustering individuals with neck and back  
32 pain when studying prognostic factors may be questioned, since prognostic factors for neck-  
33 and back pain may differ. But, as a priory analysis evaluating participants with long-duration  
34  
35  
36  
37  
38  
39  
40  
41  
42  
43  
44  
45  
46  
47  
48  
49  
50  
51  
52  
53  
54  
55  
56  
57  
58  
59  
60

1  
2  
3 activity-limiting neck and back pain separately, resulted in almost identical crude estimates,  
4  
5 we decided to merge the data to increase the statistical power.  
6

7  
8 Even though a large number of potential confounders was considered unmeasured  
9  
10 confounding could not be ruled out. There is also a risk of residual confounding due to  
11  
12 unprecise measure of confounding factors, i.e. socioeconomic status. Such bias may have led  
13  
14 to underestimation or overestimation of the results. We had no baseline information on pain  
15  
16 intensity prior to inclusion into the cohort, therefore we could not consider pain intensity as a  
17  
18 potential confounder. If pain intensity at baseline is associated with the reported levels of  
19  
20 PWA at baseline, bias due to reversed causation may be present (27). Then our results may  
21  
22 have been overestimated.  
23  
24

25  
26 However, we believe that the risk of reversed causation due to baseline pain intensity is  
27  
28 limited as individual self-perceived work ability is most likely a combination of many factors  
29  
30 other than pain, for example content, demands and organisation of work, personal attitudes,  
31  
32 motivation, knowledge and skills, and functional capacity (8). Furthermore, given that pain is  
33  
34 an important determinant of objective as well as subjective measures of health, the additional  
35  
36 analyses stratified by good and poor self-rated health indicating that good PWA is beneficial  
37  
38 no matter the degree of self-rated health also supports a low risk of bias due to reversed  
39  
40 causation.  
41  
42

43  
44 Misclassification of the exposures and outcome needs consideration. Problems to recall and to  
45  
46 appraise whether the pain during the preceding six months was activity-limiting or not may  
47  
48 have resulted in non-cases being classified as cases and vice versa. This possible  
49  
50 misclassification of the outcome is most probably non-differential potentially leading to a  
51  
52 dilution of our associations (27). The exposure PWA was assessed with only one subscale of  
53  
54 the WAI. Nonetheless, this subscale from the WAI is found to be internally coherent to the  
55  
56 full WAI (25). Furthermore, the operationalisation of the exposure PWA by dichotomising a  
57  
58  
59  
60

1  
2  
3 five category scales of mental and physical work ability and then combining them may have  
4 led to bias due to misclassification. Smoking was measured with a yes/no question about daily  
5 smoking, which is a rough measure of such exposure. By categorising former smokers as non-  
6 smokers and smokers who only smoke a few cigarettes a day as smokers, we might have  
7 introduced a misclassification of this exposure. These potential misclassifications of the  
8 exposures most likely is non-differential, thus potentially diluting the associations.  
9

10 As the follow-up period was four years work ability and smoking status may have varied  
11 across this period, and participants may have changed jobs or work assignments. If so, this  
12 would probably dilute the estimation of the association.  
13

14 With a response rate of 64% between baseline and follow-up there is a risk of selection bias.  
15 Non-responders had a significantly higher proportion of smokers and individuals with poor  
16 self-perceived work ability than did responders. If most of these individuals would experience  
17 a favourable prognosis of their long-duration activity-limiting neck/back pain, a scenario we  
18 find unlikely, our results may be overestimated. The study population in the Stockholm  
19 County are mainly non-manual employees and self-employees. The generalisability of the  
20 results may be limited in general populations with other socioeconomic status.  
21

22 Strengths of this study are the longitudinal design, and a relatively large sample size, allowing  
23 evaluation of the outcome along categories of the exposure. However, despite a large sample,  
24 the evaluation of synergetic effects may have been hampered by few cases in the reference  
25 categories. The dose-response results found supports a causal association between self-  
26 perceived work ability and long-duration activity-limiting neck/back pain, and the extensive  
27 confounder control supports internal validity. We also regard the incorporation of activity  
28 limitations in the definition of the baseline pain and in the outcome as a strength. Activity  
29 limitations is recommended to be included in measures for neck and back pain, recognised to  
30  
31  
32  
33  
34  
35  
36  
37  
38  
39  
40  
41  
42  
43  
44  
45  
46  
47  
48  
49  
50  
51  
52  
53  
54  
55  
56  
57  
58  
59  
60

1  
2  
3 be of clinical importance, and to have negative consequences for the affected individual and  
4  
5 for the society (1, 5, 18, 21).  
6

7  
8 To our knowledge this is the first study assessing self-perceived work ability and smoking  
9  
10 focusing on a favourable prognosis of long-duration activity-limiting neck/back pain. Even  
11  
12 though more research is needed to confirm our findings, they imply that good work ability  
13  
14 and not smoking daily appears to predict a favourable prognosis of long-duration activity-  
15  
16 limiting neck/back pain. Thus, interventions to improve physical and mental work ability and  
17  
18 reduce smoking may enhance the chance for a favourable prognosis in workers with long-  
19  
20 duration activity-limiting neck/back pain. Therefore, further research focusing on such  
21  
22 interventions is motivated. Such interventions could be directed towards both the workplace  
23  
24 organisation and the individual, possibly resulting in reduced human suffering and societal  
25  
26 costs.  
27  
28  
29

## 30 31 32 Conclusion

33  
34 Having a good physical and/or mental self-perceived work ability as well as not smoking on  
35  
36 daily basis is associated to a favourable prognosis in a working population with long-duration  
37  
38 activity-limiting neck/back pain. However, fulfilling both criteria seem to have no synergistic  
39  
40 prognostic effect.  
41  
42  
43

## 44 45 Acknowledgement

46  
47 Thanks to Peeter Fredlund, Research Statistician at Karolinska Institutet and SLL Centre for  
48  
49 Epidemiology and Community Medicine, Stockholm, for providing us with the data.  
50  
51

## 52 53 Contributors

54  
55 TB, LWH, ML and ES contributed to the conceptualisation and  
56  
57 methodology of the study. JH approved the conceptualisation and method and provided the  
58  
59 data resources. Based on a protocol approved by all authors TB made the statistical analyses  
60

1  
2  
3 and wrote the first draft of the manuscript. All authors contributed to the interpretation of the  
4  
5 results and critically revised the manuscript and approved the last manuscript version.  
6  
7

## 8 9 Funding

10  
11 This study was supported by AFA Insurance, grant number 170095. The funders had no role  
12  
13 in study design, data collection and analysis, decision to publish, or preparation of the  
14  
15 manuscript.  
16  
17

## 18 19 Competing interests

20  
21  
22 Non to declare.  
23  
24

## 25 26 Data availability statement

27  
28 Data are available upon reasonable request. Due to ethical restrictions and laws  
29  
30 (GDPR) of disclosing personal data, authors have to seek permission to allow us  
31  
32 to make the data used in this study available. Data will be available upon request  
33  
34 after permission is granted from the Karolinska Institutet's Ethics Review Board  
35  
36 in Stockholm. Inquiries for data access should  
37  
38 first be sent to [eva.skillgate@ki.se](mailto:eva.skillgate@ki.se), who will then contact the ethics board for  
39  
40 permission to openly share the data.  
41  
42  
43  
44  
45  
46  
47

## 48 49 References

- 50  
51 1. Vos T, Abajobir AA, Abate KH, et al. Global, regional, and national incidence,  
52  
53 prevalence, and years lived with disability for 328 diseases and injuries for 195 countries,  
54  
55 1990–2016: a systematic analysis for the Global Burden of Disease Study 2016. *The Lancet*.  
56  
57 2017;390(10100):1211-59.  
58  
59  
60

- 1  
2  
3 2. Hartvigsen J, Hancock MJ, Kongsted A, et al. What low back pain is and why  
4 we need to pay attention. *The Lancet*. 2018;391(10137):2356-67.  
5  
6
- 7 3. Hoy DG, Protani M, De R, Buchbinder R. The epidemiology of neck pain. *Best  
8 Pract Res Clin Rheumatol*. 2010;24(6):783-92.  
9  
10
- 11 4. Cochrane A, Higgins NM, Rothwell C, et al. Work Outcomes in Patients Who  
12 Stay at Work Despite Musculoskeletal Pain. *J Occup Rehabil*. 2018;28(3):559-67.  
13  
14
- 15 5. Schofield DJ, Shrestha RN, Percival R, Callander EJ, Kelly SJ, Passey ME.  
16 Early retirement and the financial assets of individuals with back problems. *Eur Spine J*.  
17 2011;20(5):731-6.  
18  
19
- 20 6. Green BN, Johnson CD, Haldeman S, et al. A scoping review of  
21 biopsychosocial risk factors and co-morbidities for common spinal disorders. *PLoS One*.  
22 2018;13(6):e0197987.  
23  
24
- 25 7. Gould R, Ilmarinen J, Järvisalo J, Koskinen S. Dimensions of Work Ability.  
26 Results of the 2000 Health Survey. Vaasa: Waasa Graphics Oy; 2008.  
27  
28
- 29 8. Ilmarinen J. Work ability, a comprehensive concept for occupational health  
30 research and prevention. *Scand J Work Environ Health*. 2009;35(1):1-5.  
31  
32
- 33 9. Ilmarinen J. The Work Ability Index (WAI). *Occupational Medicine*.  
34 2006;57(2):160.  
35  
36
- 37 10. Ahlstrom L, Grimby-Ekman A, Hagberg M, Dellve L. The work ability index  
38 and single-item question: associations with sick leave, symptoms, and health – a prospective  
39 study of women on long-term sick leave. *Scand J Work Environ Health*. 2010;36(5):404-12.  
40  
41
- 42 11. Kinnunen U, Natti J. Work ability score and future work ability as predictors of  
43 register-based disability pension and long-term sickness absence: A three-year follow-up  
44 study. *Scand J Public Health*. 2018;46(3):321-30.  
45  
46  
47  
48  
49  
50  
51  
52  
53  
54  
55  
56  
57  
58  
59  
60



- 1  
2  
3 12. Lundin A, Kjellberg K, Leijon O, Punnett L, Hemmingsson T. The Association  
4 Between Self-Assessed Future Work Ability and Long-Term Sickness Absence, Disability  
5 Pension and Unemployment in a General Working Population: A 7-Year Follow-Up Study. *J*  
6 *Occup Rehabil.* 2016;26(2):195-203.  
7  
8  
9  
10  
11  
12 13. Reeuwijk KG, Robroek SJ, Niessen MA, Kraaijenhagen RA, Vergouwe Y,  
13 Burdorf A. The Prognostic Value of the Work Ability Index for Sickness Absence among  
14 Office Workers. *PLoS One.* 2015;10(5):e0126969.  
15  
16  
17  
18  
19 14. Sundstrup E, Jakobsen MD, Mortensen OS, Andersen LL. Joint association of  
20 multimorbidity and work ability with risk of long-term sickness absence: a prospective cohort  
21 study with register follow-up. *Scand J Work Environ Health.* 2017;43(2):146-54.  
22  
23  
24  
25  
26 15. Nordstoga AL, Vasseljen O, Meisingset I, Nilsen TIL, Unsgaard-Tondel M.  
27 Improvement in Work Ability, Psychological Distress and Pain Sites in Relation to Low Back  
28 Pain Prognosis: A Longitudinal Observational Study in Primary Care. *Spine (Phila Pa 1976).*  
29 2019;44(7):E423-e9.  
30  
31  
32  
33  
34  
35 16. Holm LW, Bohman T, Lekander M, Magnusson C, Skillgate E. Risk of  
36 transition from occasional neck/back pain to long-duration activity limiting neck/back pain: a  
37 cohort study on the influence of poor work ability and sleep disturbances in the working  
38 population in Stockholm County. *BMJ Open.* 2020;10(6):e033946.  
39  
40  
41  
42  
43  
44 17. van den Berg TI, Elders LA, de Zwart BC, Burdorf A. The effects of work-  
45 related and individual factors on the Work Ability Index: a systematic review. *Occup Environ*  
46 *Med.* 2009;66(4):211-20.  
47  
48  
49  
50  
51 18. Supplement article: Carroll LJ, Hurwitz EL, Cote P, et al. Research priorities  
52 and methodological implications: the Bone and Joint Decade 2000-2010 Task Force on Neck  
53 Pain and Its Associated Disorders. *Spine.* 2008;33(4 Suppl):S214-20.  
54  
55  
56  
57  
58  
59  
60

19. Hayden JA, Dunn KM, van der Windt DA, Shaw WS. What is the prognosis of back pain? *Best Pract Res Clin Rheumatol*. 2010;24(2):167-79.
20. Svensson AC, Fredlund P, Laflamme L, et al. Cohort profile: The Stockholm Public Health Cohort. *Int J Epidemiol*. 2013;42(5):1263-72.
21. Dionne CE, Dunn KM, Croft PR, et al. A consensus approach toward the standardization of back pain definitions for use in prevalence studies. *Spine (Phila Pa 1976)*. 2008;33(1):95-103.
22. Tuomi K, Ilmarinen J, Jahkola A, Katajarinne L, Tulkki A. *Work ability index*. 2 ed. Helsinki: Finnish Institute of Occupational Health; 1998.
23. de Zwart BCH, Frings-Dresen MHW, van Duivenbooden JC. Test–retest reliability of the Work Ability Index questionnaire. *Occupational Medicine*. 2002;52(4):177-81.
24. Radkiewicz P, Widerszal-Bazyl M. Psychometric properties of Work Ability Index in the light of comparative survey study. *International Congress Series*. 2005;1280:304-9.
25. Lundin A, Leijon O, Vaez M, Hallgren M, Torgén M. Predictive validity of the Work Ability Index and its individual items in the general population. *Scand J Public Health*. 2017;45(4):350-6.
26. Verkerk K, Luijsterburg PA, Miedema HS, Pool-Goudzwaard A, Koes BW. Prognostic factors for recovery in chronic nonspecific low back pain: a systematic review. *Phys Ther*. 2012;92(9):1093-108.
27. Lash TL, VanderWeele TJ, Haneuse S, Rothman KJ. *Modern epidemiology*. Philadelphia, PA: Wolters Kluwer; 2021.

- 1  
2  
3 28. Vittinghoff E, Glidden DV, Shiboski SC, McCulloch CE. Regression Methods  
4 in Biostatistics, Linear, Logistic, Survival, and Repeated Measures Models. 2nd ed. New  
5 York, USA: Springer New York; 2012.  
6  
7  
8  
9  
10 29. Andersson T, Alfredsson L, Kallberg H, Zdravkovic S, Ahlbom A. Calculating  
11 measures of biological interaction. *Eur J Epidemiol.* 2005;20(7):575-9.  
12  
13  
14 30. Perruccio AV, Power JD, Badley EM. Arthritis onset and worsening self-rated  
15 health: a longitudinal evaluation of the role of pain and activity limitations. *Arthritis Rheum.*  
16 2005;53(4):571-7  
17  
18  
19 31. Shiri R, Karppinen J, Leino-Arjas P, Solovieva S, Viikari-Juntura E. The  
20 association between smoking and low back pain: a meta-analysis. *Am J Med.* 2010;123(1):87  
21 e7-35.  
22  
23  
24  
25  
26  
27  
28 32. Shi Y, Weingarten TN, Mantilla CB, Hooten WM, Warner DO. Smoking and  
29 Pain: Pathophysiology and Clinical Implications. *Anesthesiology.* 2010;113(4):977-92.  
30  
31  
32  
33  
34  
35

## 36 Figure legends

37  
38  
39 **Figure 1** Flow chart describing the inclusion of participants into the study population and the  
40 analyses sample. NP; neck pain, BP; low back pain, PWA; perceived work ability.  
41  
42  
43  
44  
45  
46  
47  
48  
49  
50  
51  
52  
53  
54  
55  
56  
57  
58  
59  
60

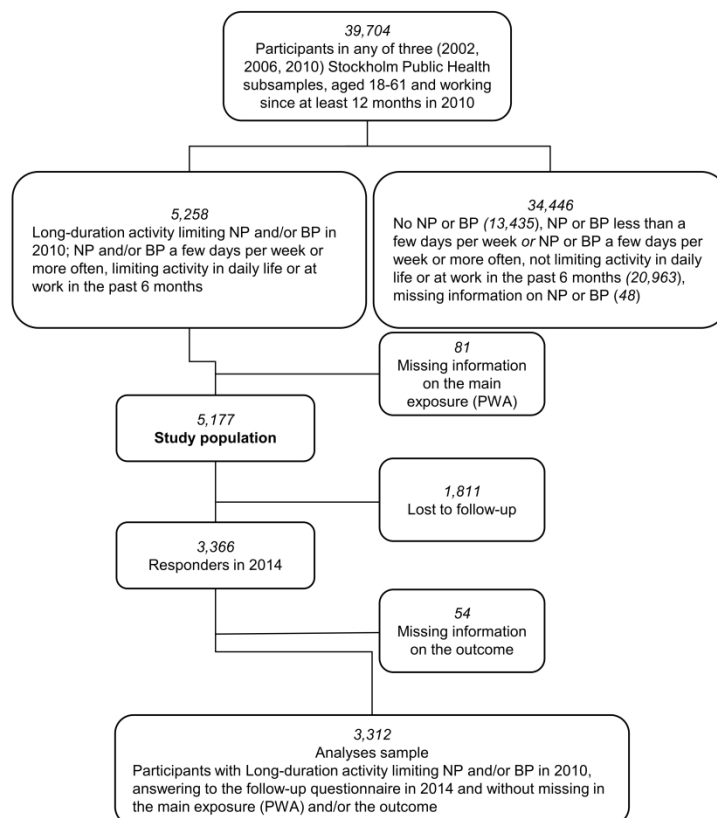

Figure 1. Flow chart describing the inclusion of participants into the study population and the analyses sample. NP; neck pain, BP; low back pain, PWA; perceived work ability.

383x511mm (300 x 300 DPI)

## Appendix Potential confounding factors.

| Potential confounder                           | Measurement                                                                                                                                                                                                  | Categorisation in the analyses                                                                                                                                                                        |
|------------------------------------------------|--------------------------------------------------------------------------------------------------------------------------------------------------------------------------------------------------------------|-------------------------------------------------------------------------------------------------------------------------------------------------------------------------------------------------------|
| Daily smoking <sup>a</sup>                     | "Do you currently smoke daily or almost daily?"                                                                                                                                                              | No, yes                                                                                                                                                                                               |
| Self-perceived work ability <sup>b</sup>       | "How do you rate your current work ability with respect to the physical demands/mental demands of your work"                                                                                                 | Good, moderate, and poor                                                                                                                                                                              |
| Sex                                            | Sex at baseline 2010                                                                                                                                                                                         | Men, women (no other alternatives available)                                                                                                                                                          |
| Age                                            | Age at baseline 2010                                                                                                                                                                                         | Continuous and in quartiles (18-38), (39-46), (47-54), (55-61)                                                                                                                                        |
| Body mass index (BMI)                          | Weight/height <sup>2</sup> (kg/m <sup>2</sup> )                                                                                                                                                              | Categorical; underweight (<18.5), normal weight (18.5-24.9), overweight (25-29.9), obese (≥30)                                                                                                        |
| Socioeconomic status (SES)                     | According to the classification from Statistics Sweden. Based on current occupation and education for the economically active population.                                                                    | Unskilled/semiskilled worker, skilled worker, low level non-manual employees, middle level non-manual employees, high level non-manual employees/self-employed, self-employed (other than high level) |
| Household                                      | "Do you live together with someone?"                                                                                                                                                                         | Categorical; living together with adult/s and child/ren, living alone, living with child/children only                                                                                                |
| Headache/migraine                              | "Do you have headache or migraine?"                                                                                                                                                                          | No, yes; somewhat or severe                                                                                                                                                                           |
| Psychological distress <sup>1,2</sup>          | Based on the 12-item General Health Questionnaire (GHQ-12), using the scoring system 0-0-1-1.                                                                                                                | No (0-2), mild (3-6), severe (7-12)                                                                                                                                                                   |
| Personal support <sup>2,3</sup>                | "Do you know persons who can provide you with personal support for personal problems or crises in your life?"                                                                                                | No-usually not or never, yes-always or for the most part                                                                                                                                              |
| Sleep disturbances                             | "Do you have sleep disturbances"                                                                                                                                                                             | No, yes; somewhat or severe                                                                                                                                                                           |
| Sedentary leisure time                         | "Refer to your leisure physical activity during the past 12 months? If the activities vary during the year and during a week, refer to an average." Sitting/watching TV/reading during leisure time.         | Categorical: less than 2 hours/day, 2-3 hours/day, more than 3 hours/day                                                                                                                              |
| Leisure physical activity - moderate intensity | "Refer to your leisure physical activity during the past 12 months? If the activities vary during the year and during a week, refer to an average." Walking/biking during leisure time.                      | Categorical: less than 20 minutes/day, 20-40 minutes/day, more than 40 minutes/day                                                                                                                    |
| Leisure physical activity - high intensity     | Refer to your leisure physical activity during the past 12 months? If the activities vary during the year and during a week, refer to an average." Exercise, other than walking/biking, during leisure time. | Categorical: less than 1 hour/week, 1-2 hours/week, more than 2 hours/week                                                                                                                            |
| Physical workload <sup>4</sup>                 | "Refer to your physical activity during your daily activity and/or work during the past 12 months? If the activity vary during the year and during a week, refer to an average."                             | Categorical; sedentary at least to 50 %, standing/walking/some lifting, walking/lifting/heavy work                                                                                                    |
| Subsample participation <sup>c</sup>           | Refers to the subsample of the Stockholm Public Health Cohort the participants belonged to.                                                                                                                  | Categorical: 2002/2007/2010/2014, 2006/2010/2014, 2010/2014                                                                                                                                           |

<sup>a</sup> Daily smoking was assessed as a potential confounder in the analyses with self-perceived work ability as exposure. <sup>b</sup> Self-perceived work ability was assessed as a potential confounder in the analyses with daily smoking as exposure. <sup>c</sup> Subsample participation was included in all adjusted models order to adjust for potential systematic difference between the subsamples. <sup>#</sup> Bibliographical references to definition and psychometric properties of the factors.

- Goldberg DP, Gater R, Sartorius N et al. The validity of two versions of the GHQ in the WHO study of mental illness in general health care. *Psychol Med.* 1997;27(1):191-7.
- McDowell I. *Measuring health a guide to rating scales and questionnaires.* 3rd ed. New York ; Oxford: Oxford University Press; 2006. xvi, 748 p
- Unden AL, Orth-Gomer K. Development of a social support instrument for use in population surveys. *Soc Sci Med.* 1989;29(12):1387-92.4. Leijon O, Wiktorin C, Harenstam A, Karlqvist L. Validity of a self-administered questionnaire for assessing physical work loads in a general population. *J Occup Environ Med.* 2002;44(8):724-35.

STROBE Statement—Checklist of items that should be included in reports of *cohort studies*

|                              | Item No | Recommendation                                                                                                                                                                                                                                                                                                                                                                                                                                                                                                                            |
|------------------------------|---------|-------------------------------------------------------------------------------------------------------------------------------------------------------------------------------------------------------------------------------------------------------------------------------------------------------------------------------------------------------------------------------------------------------------------------------------------------------------------------------------------------------------------------------------------|
| <b>Title and abstract</b>    | 1       | (a) Indicate the study's design with a commonly used term in the title or the abstract<br><b>Page 1.</b><br>(b) Provide in the abstract an informative and balanced summary of what was done and what was found <b>Page 2-4.</b>                                                                                                                                                                                                                                                                                                          |
| <b>Introduction</b>          |         |                                                                                                                                                                                                                                                                                                                                                                                                                                                                                                                                           |
| Background/rationale         | 2       | Explain the scientific background and rationale for the investigation being reported<br><b>Page 5 and 6.</b>                                                                                                                                                                                                                                                                                                                                                                                                                              |
| Objectives                   | 3       | State specific objectives, including any prespecified hypotheses<br><b>Page 6, last paragraph.</b>                                                                                                                                                                                                                                                                                                                                                                                                                                        |
| <b>Methods</b>               |         |                                                                                                                                                                                                                                                                                                                                                                                                                                                                                                                                           |
| Study design                 | 4       | Present key elements of study design early in the paper <b>Page 7, first paragraph.</b>                                                                                                                                                                                                                                                                                                                                                                                                                                                   |
| Setting                      | 5       | Describe the setting, locations, and relevant dates, including periods of recruitment, exposure, follow-up, and data collection <b>Page 7, first paragraph, and Figure 1.</b>                                                                                                                                                                                                                                                                                                                                                             |
| Participants                 | 6       | (a) Give the eligibility criteria, and the sources and methods of selection of participants. Describe methods of follow-up <b>Page 7, first paragraph, and Figure 1.</b><br>(b) For matched studies, give matching criteria and number of exposed and unexposed <b>N/A.</b>                                                                                                                                                                                                                                                               |
| Variables                    | 7       | Clearly define all outcomes, exposures, predictors, potential confounders, and effect modifiers. Give diagnostic criteria, if applicable <b>Page 7-9 and Appendix.</b>                                                                                                                                                                                                                                                                                                                                                                    |
| Data sources/<br>measurement | 8*      | For each variable of interest, give sources of data and details of methods of assessment (measurement). Describe comparability of assessment methods if there is more than one group <b>Page 7-10 and Appendix.</b>                                                                                                                                                                                                                                                                                                                       |
| Bias                         | 9       | Describe any efforts to address potential sources of bias<br><b>Page 9 (confounding) and appendix, Page 10 (Additional analyses).</b>                                                                                                                                                                                                                                                                                                                                                                                                     |
| Study size                   | 10      | Explain how the study size was arrived at <b>Page 7, first paragraph and Figure 1.</b>                                                                                                                                                                                                                                                                                                                                                                                                                                                    |
| Quantitative variables       | 11      | Explain how quantitative variables were handled in the analyses. If applicable, describe which groupings were chosen and why <b>Page 8-10 and Appendix.</b>                                                                                                                                                                                                                                                                                                                                                                               |
| Statistical methods          | 12      | (a) Describe all statistical methods, including those used to control for confounding<br><b>Page 9 and 10, "Statistics".</b><br>(b) Describe any methods used to examine subgroups and interactions<br><b>Page 9 and 10, "Statistics".</b><br>(c) Explain how missing data were addressed<br><b>Page 9 and 10, "Statistics".</b><br>(d) If applicable, explain how loss to follow-up was addressed<br><b>Page 9 and 10, "Statistics" and Figure 1.</b><br>(e) Describe any sensitivity analyses<br><b>Page 10, "Additional analyses".</b> |
| <b>Results</b>               |         |                                                                                                                                                                                                                                                                                                                                                                                                                                                                                                                                           |
| Participants                 | 13*     | (a) Report numbers of individuals at each stage of study—eg numbers potentially eligible, examined for eligibility, confirmed eligible, included in the study, completing follow-up, and analysed <b>Figure 1, Table 1, 2 and 3.</b><br>(b) Give reasons for non-participation at each stage <b>Figure 1.</b><br>(c) Consider use of a flow diagram <b>Figure 1.</b>                                                                                                                                                                      |
| Descriptive data             | 14*     | (a) Give characteristics of study participants (eg demographic, clinical, social) and information on exposures and potential confounders <b>Table 1 and Appendix.</b>                                                                                                                                                                                                                                                                                                                                                                     |

|                          |     |                                                                                                                                                                                                                                                                                                                                                                                                                                                                                                             |
|--------------------------|-----|-------------------------------------------------------------------------------------------------------------------------------------------------------------------------------------------------------------------------------------------------------------------------------------------------------------------------------------------------------------------------------------------------------------------------------------------------------------------------------------------------------------|
|                          |     | (b) Indicate number of participants with missing data for each variable of interest <b>Table 1 and Figure 1.</b>                                                                                                                                                                                                                                                                                                                                                                                            |
|                          |     | (c) Summarise follow-up time (eg, average and total amount) <b>N/A.</b>                                                                                                                                                                                                                                                                                                                                                                                                                                     |
| Outcome data             | 15* | Report numbers of outcome events or summary measures over time <b>Page 11, Table 2 and 3.</b>                                                                                                                                                                                                                                                                                                                                                                                                               |
| Main results             | 16  | (a) Give unadjusted estimates and, if applicable, confounder-adjusted estimates and their precision (eg, 95% confidence interval). Make clear which confounders were adjusted for and why they were included <b>Page 14, Table 2 and Table 3.</b><br>(b) Report category boundaries when continuous variables were categorized <b>Appendix and Table 1.</b><br>(c) If relevant, consider translating estimates of relative risk into absolute risk for a meaningful time period <b>Page 16 and Table 2.</b> |
| Other analyses           | 17  | Report other analyses done—eg analyses of subgroups and interactions, and sensitivity analyses <b>Page 16, last paragraph. Page 18, "Additional results" and Table 3.</b>                                                                                                                                                                                                                                                                                                                                   |
| <b>Discussion</b>        |     |                                                                                                                                                                                                                                                                                                                                                                                                                                                                                                             |
| Key results              | 18  | Summarise key results with reference to study objectives <b>Page 18 and first paragraph at page 19.</b>                                                                                                                                                                                                                                                                                                                                                                                                     |
| Limitations              | 19  | Discuss limitations of the study, taking into account sources of potential bias or imprecision. Discuss both direction and magnitude of any potential bias <b>Page 19 last paragraph. Page 20 and page 21 paragraph 1 and 2.</b>                                                                                                                                                                                                                                                                            |
| Interpretation           | 20  | Give a cautious overall interpretation of results considering objectives, limitations, multiplicity of analyses, results from similar studies, and other relevant evidence <b>Page 21, two last paragraphs, and page 22 first paragraph.</b>                                                                                                                                                                                                                                                                |
| Generalisability         | 21  | Discuss the generalisability (external validity) of the study results <b>Page 21, paragraph three and page 22 second paragraph and in the conclusion.</b>                                                                                                                                                                                                                                                                                                                                                   |
| <b>Other information</b> |     |                                                                                                                                                                                                                                                                                                                                                                                                                                                                                                             |
| Funding                  | 22  | Give the source of funding and the role of the funders for the present study and, if applicable, for the original study on which the present article is based <b>Page 23, "Funding".</b>                                                                                                                                                                                                                                                                                                                    |

\*Give information separately for exposed and unexposed groups.

**Note:** An Explanation and Elaboration article discusses each checklist item and gives methodological background and published examples of transparent reporting. The STROBE checklist is best used in conjunction with this article (freely available on the Web sites of PLoS Medicine at <http://www.plosmedicine.org/>, Annals of Internal Medicine at <http://www.annals.org/>, and Epidemiology at <http://www.epidem.com/>). Information on the STROBE Initiative is available at <http://www.strobe-statement.org>.
