# Supplementary material for: Influence of work ability and smoking on the prognosis of long-duration activity-limiting neck/back pain: a cohort study of a Swedish working population
Source: PubMed Central journal article supplement — BMJ Open. 2022 Apr 11;12(4):e054512. doi: 10.1136/bmjopen-2021-054512 (PMC9006807; doi:10.1136/bmjopen-2021-054512), 2022-04-11
Supplement: bmjopen-2021-054512supp001.pdf [file bmjopen-2021-054512supp001.pdf]

## Appendix Potential confounding factors.

| Potential confounder                           | Measurement                                                                                                                                                                                                  | Categorisation in the analyses                                                                                                                                                                        |
|------------------------------------------------|--------------------------------------------------------------------------------------------------------------------------------------------------------------------------------------------------------------|-------------------------------------------------------------------------------------------------------------------------------------------------------------------------------------------------------|
| Daily smoking <sup>a</sup>                     | "Do you currently smoke daily or almost daily?"                                                                                                                                                              | No, yes                                                                                                                                                                                               |
| Self-perceived work ability <sup>b</sup>       | "How do you rate your current work ability with respect to the physical demands/mental demands of your work?"                                                                                                | Good, moderate, and poor                                                                                                                                                                              |
| Sex                                            | Sex at baseline 2010                                                                                                                                                                                         | Men, women (no other alternatives available)                                                                                                                                                          |
| Age                                            | Age at baseline 2010                                                                                                                                                                                         | Continuous and in quartiles (18-38), (39-46), (47-54), (55-61)                                                                                                                                        |
| Body mass index (BMI)                          | Weight/height <sup>2</sup> (kg/m <sup>2</sup> )                                                                                                                                                              | Categorical; underweight (<18.5), normal weight (18.5-24.9), overweight (25-29.9), obese (≥30)                                                                                                        |
| Socioeconomic status (SES)                     | According to the classification from Statistics Sweden. Based on current occupation and education for the economically active population.                                                                    | Unskilled/semiskilled worker, skilled worker, low level non-manual employees, middle level non-manual employees, high level non-manual employees/self-employed, self-employed (other than high level) |
| Household                                      | "Do you live together with someone?"                                                                                                                                                                         | Categorical; living together with adult/s and child/ren, living alone, living with child/children only                                                                                                |
| Headache/migraine                              | "Do you have headache or migraine?"                                                                                                                                                                          | No, yes; somewhat or severe                                                                                                                                                                           |
| Psychological distress <sup>1,2</sup>          | Based on the 12-item General Health Questionnaire (GHQ-12), using the scoring system 0-0-1-1.                                                                                                                | No (0-2), mild (3-6), severe (7-12)                                                                                                                                                                   |
| Personal support <sup>2,3</sup>                | "Do you know persons who can provide you with personal support for personal problems or crises in your life?"                                                                                                | No-usually not or never, yes-always or for the most part                                                                                                                                              |
| Sleep disturbances                             | "Do you have sleep disturbances?"                                                                                                                                                                            | No, yes; somewhat or severe                                                                                                                                                                           |
| Sedentary leisure time                         | "Refer to your leisure physical activity during the past 12 months? If the activities vary during the year and during a week, refer to an average." Sitting/watching TV/reading during leisure time.         | Categorical: less than 2 hours/day, 2-3 hours/day, more than 3 hours/day                                                                                                                              |
| Leisure physical activity - moderate intensity | "Refer to your leisure physical activity during the past 12 months? If the activities vary during the year and during a week, refer to an average." Walking/biking during leisure time.                      | Categorical: less than 20 minutes/day, 20-40 minutes/day, more than 40 minutes/day                                                                                                                    |
| Leisure physical activity - high intensity     | Refer to your leisure physical activity during the past 12 months? If the activities vary during the year and during a week, refer to an average." Exercise, other than walking/biking, during leisure time. | Categorical: less than 1 hour/week, 1-2 hours/week, more than 2 hours/week                                                                                                                            |
| Physical workload <sup>4</sup>                 | "Refer to your physical activity during your daily activity and/or work during the past 12 months? If the activity vary during the year and during a week, refer to an average."                             | Categorical; sedentary at least to 50 %, standing/walking/some lifting, walking/lifting/heavy work                                                                                                    |
| Subsample participation <sup>c</sup>           | Refers to the subsample of the Stockholm Public Health Cohort the participants belonged to.                                                                                                                  | Categorical: 2002/2007/2010/2014, 2006/2010/2014, 2010/2014                                                                                                                                           |

<sup>a</sup> Daily smoking was assessed as a potential confounder in the analyses with self-perceived work ability as exposure. <sup>b</sup> Self-perceived work ability was assessed as a potential confounder in the analyses with daily smoking as exposure. <sup>c</sup> Subsample participation was included in all adjusted models order to adjust for potential systematic difference between the subsamples. <sup>d</sup> Bibliographical references to definition and psychometric properties of the factors.

1. Goldberg DP, Gater R, Sartorius N et al. The validity of two versions of the GHQ in the WHO study of mental illness in general health care. *Psychol Med.* 1997;27(1):191-7.
2. McDowell I. *Measuring health a guide to rating scales and questionnaires.* 3rd ed. New York; Oxford: Oxford University Press; 2006. xvi, 748 p
3. Unden AL, Orth-Gomer K. Development of a social support instrument for use in population surveys. *Soc Sci Med.* 1989;29(12):1387-92. 4. Leijon O, Wiktorin C, Harenstam A, Karlqvist L. Validity of a self-administered questionnaire for assessing physical work loads in a general population. *J Occup Environ Med.* 2002;44(8):724-35.
